## 28 **Abstract**

29 The Two-Partner secretion pathway mediates protein transport across the outer membrane of  
30 Gram-negative bacteria. TpsB transporters belong to the Omp85 superfamily, whose members  
31 catalyze protein insertion into, or translocation across membranes without external energy sources.  
32 They are composed of a transmembrane  $\beta$  barrel preceded by two periplasmic POTRA domains  
33 that bind the incoming protein substrate. Here we used an integrative approach combining *in vivo*  
34 assays, mass spectrometry, nuclear magnetic resonance and electron paramagnetic resonance  
35 techniques suitable to detect minor states in heterogeneous populations, to explore transient  
36 conformers of the TpsB transporter FhaC. This revealed substantial, spontaneous conformational  
37 changes with a portion of the POTRA2 domain coming close to the lipid bilayer and surface loops.  
38 Specifically, the amphipathic  $\beta$  hairpin immediately preceding the first barrel strand can insert into  
39 the  $\beta$  barrel. We propose that these motions enlarge the channel and may hoist the substrate into it  
40 for secretion. An anchor region at the interface of the  $\beta$  barrel and the POTRA2 domain stabilizes  
41 the transporter in the course of secretion. Our data propose a solution to the conundrum how these  
42 proteins mediate protein secretion without the need for cofactors, by utilizing intrinsic protein  
43 dynamics.

44

## 45 **Introduction**

46 The Two-Partner Secretion (TPS) pathway is dedicated to the export of large proteins notably  
47 serving as virulence factors (Guerin et al., 2017). The TpsB transporters are transmembrane  $\beta$ -  
48 barrel proteins that secrete their substrates, collectively called TpsA proteins, across the outer  
49 membrane of various Gram-negative bacteria. They belong to the ubiquitous Omp85 superfamily  
50 whose members mediate protein insertion into, or translocation across membranes of bacteria and

51 eukaryotic organelles, and which includes the essential bacterial BamA transporters (Heinz &  
52 Lithgow, 2014; Knowles et al., 2009; Noinaj et al., 2017). The FhaB/FhaC pair of *Bordetella*  
53 *pertussis* is a model TPS system, in which the FhaC transporter mediates the translocation of the  
54 adhesin FhaB across the outer membrane (Fan et al., 2012).

55 Omp85 transporters are composed of N-terminal POTRA domains - two in the case of TpsB  
56 transporters - followed by a 16-stranded transmembrane  $\beta$  barrel, which for FhaC is the FhaB  
57 translocation pore (Baud et al., 2014). The POTRA domains mediate protein-protein interactions  
58 in the periplasm, and notably recognition of client proteins (Delattre et al., 2011). Another  
59 hallmark feature of the Omp85 superfamily is the extracellular loop L6 that folds back inside the  
60 barrel and harbors a conserved motif at its tip forming a salt bridge interaction with a specific motif  
61 of the inner  $\beta$ -barrel wall (Gu et al., 2016; Maier et al., 2015; Noinaj et al., 2013).

62 A specific feature of TpsB transporters is an N-terminal  $\alpha$  helix called H1 that plugs the  $\beta$  barrel  
63 (Clantin et al., 2007; Guerin et al., 2014; Guerin et al., 2020; Maier et al., 2015). An extended  
64 linker follows H1 and joins it to the POTRA1 domain in the periplasm. Recently, the X-ray  
65 structures of other TpsB transporters, CdiB<sup>Ab</sup> and CdiB<sup>Ec</sup>, have shown very similar folds to that of  
66 FhaC, albeit with slightly different positions of H1 in the barrel (Guerin et al., 2020). Both H1 and  
67 L6 stabilize the barrel in a closed conformation that most likely corresponds to the resting state of  
68 the transporter (Guerin et al., 2020; Maier et al., 2015). The  $\beta$  barrel, the L6 loop and the two  
69 POTRA domains are essential for transport activity (Clantin et al., 2007).

70 Omp85 transporters likely function in the absence of ATP or an electrochemical gradient. They  
71 appear to be very dynamic and to undergo conformational cycling (Doerner & Sousa, 2017; Guerin  
72 et al., 2020; Hartmann et al., 2018; Iadanza et al., 2020; Renault et al., 2011; Warner et al., 2017).  
73 Lateral opening of the barrel between the first and last anti-parallel  $\beta$  strands is a common

74 mechanistic feature of Omp85 transporters, which is involved in their respective functions  
75 (Diederichs et al., 2020; Doyle & Bernstein, 2019; Estrada Mallarino et al., 2015; Guerin et al.,  
76 2020; Höhr et al., 2018; Iadanza et al., 2016; Noinaj et al., 2014; Tomasek et al., 2020).

77 The mechanism of two-partner secretion remains poorly understood, but it is known to involve  
78 substantial conformational changes of the transporter including exit of H1 from the  $\beta$  barrel and  
79 motions of the L6 loop (Guerin et al., 2014; Guerin et al., 2020; Guerin et al., 2015). The motion  
80 of H1 toward the periplasm is facilitated by conformational changes of flexible regions of the  
81 barrel, in particular the first  $\beta$ -barrel strand B1 and the extracellular loops L1, L2 and L6 (Guerin  
82 et al., 2020). Binding of the N-terminal so-called TPS domain of the substrate protein to the  
83 POTRA domains of its transporter also appears to enhance conformational changes (Guerin et al.,  
84 2020; Guerin et al., 2015). How the substrate enters the pore and is progressively hoisted towards  
85 the cell surface without backsliding to the periplasm remains unknown, but we hypothesize a cyclic  
86 mechanism implying yet uncharacterized, transient conformations of TpsB transporters. In this  
87 work we have explored such FhaC conformers using biophysical techniques suitable to detect  
88 minor states in heterogeneous populations. Our data show that alternative conformational states of  
89 FhaC exist even in the absence of its substrate and indicate that they are linked to its activity.

90

## 91 **Results**

### 92 **Effects of freezing the conformation of the POTRA2 domain on secretion activity**

93 To determine the importance of flexibility of the POTRA2 domain for FhaC function, we searched  
94 for specific H bond- or salt bridge-mediated interactions present in the resting conformation (i.e.,  
95 corresponding to the crystallographic structure) and disrupted them to loosen the structure or  
96 conversely replaced them with disulfide (S-S) bonds to limit motions of the corresponding regions.

97 Of note, FhaC is naturally devoid of Cys residues. Residues involved in interactions between the  
98 POTRA2 domain and the barrel (Asn<sup>245</sup>-Ser<sup>157</sup> and Asn<sup>245</sup>-Lys<sup>184</sup>) and in a barrel-distal region of  
99 the POTRA2 domain (Asp<sup>165</sup>-Lys<sup>171</sup>) were replaced with Ala or Cys, and the effects of these  
100 mutations on secretion activity were determined (Figure 1A-E). S-S bond formation is catalyzed  
101 by the periplasmic disulfide oxidase DsbA in the course of biogenesis, which generally affects  
102 SDS-PAGE migration of the protein in the absence of a reducing agent, unless the intervening  
103 loop between the Cys residues is too short. The Asn<sup>245</sup>Ala substitution markedly decreased the  
104 activity of FhaC and somewhat reduced its amount in the membrane, unlike formation of Cys<sup>157</sup>-  
105 Cys<sup>245</sup> or Cys<sup>184</sup>-Cys<sup>245</sup> S-S bonds (Figure 1C-E). This indicates that these barrel-POTRA2  
106 interactions contribute to FhaC activity, possibly because they stabilize its conformation in the  
107 secretion cycle. To the contrary, the engineered Cys<sup>165</sup>+Cys<sup>171</sup> substitutions strongly reduced the  
108 level and the activity of FhaC in a *dsbA*<sup>+</sup> background. Although protein migration was not affected  
109 the S-S bond was most likely formed, since secretion was not reduced in a *dsbA*<sup>-</sup> background or  
110 with the individual substitutions. The observation that S-S bond formation between these two Cys  
111 residues is detrimental points to the need for flexibility in this barrel-distal region of the POTRA2  
112 domain.

113

#### 114 **Spontaneous in vivo conformational changes of FhaC independent of substrate**

115 We simultaneously replaced two residues distant in the X-ray structure of FhaC with Cys residues  
116 in order to detect alternative conformers of the transporter. The rationale was that conformational  
117 changes of FhaC might promote spontaneous S-S bond formation if the two Cys residues come  
118 close to each other, which might be detected even for short-lived alternative conformers since the  
119 S-S bound species accumulates over time. These experiments were performed in a *dsbA*<sup>-</sup>

120 background, such that S-S bonds formed after FhaC biogenesis and thus exclusively resulted from  
121 its conformational changes in the membrane. We combined Cys residues in surface loops  
122 (positions 224 in L1, 290 in L3, 342 in L4, 391 in L5, 503 in L7 and 545 in L8) with periplasmic  
123 Cys residues in the POTRA2 domain (positions 167, 176, 195), in the POTRA1 domain (position  
124 86) or in the linker (positions 33, 48) (Figure 2A). None of the single Cys substitutions markedly  
125 affected the secretion activity of FhaC (Baud et al., 2014; Guerin et al., 2014; Guerin et al., 2015).  
126 Under non-reducing conditions, partial oxidation of FhaC as detected by abnormal migration in  
127 SDS-PAGE was identified for the combinations Cys<sup>48</sup>+Cys<sup>224</sup>, Cys<sup>176</sup>+Cys<sup>224</sup>, Cys<sup>48</sup>+Cys<sup>545</sup> and  
128 Cys<sup>195</sup>+Cys<sup>224</sup>, and weakly for Cys<sup>167</sup>+Cys<sup>224</sup>, indicating S-S bonds between the engineered Cys  
129 residues (Figure 2B). Thus, the last portion of the linker, the  $\alpha$  helix H4 and the b5-b6  $\beta$  hairpin  
130 of the POTRA2 domain can be found close to the extracellular loop L1, proximal to the B1-B16  
131  $\beta$ -barrel seam in specific conformers. To confirm S-S bond formation, the FhaC<sup>C48+C224</sup> and  
132 FhaC<sup>C195+C224</sup> variants were overexpressed, purified and subjected to liquid chromatography  
133 coupled to tandem mass spectrometry (MS) in reducing and non-reducing conditions. In both  
134 variant samples, the regions that contain the Cys residues were detected only when proteolytic  
135 digestion was performed after reduction and alkylation (Figure 2 Supplement 1), which supports  
136 S-S bond formation between the linker and L1 in FhaC<sup>C48+C224</sup> and between the POTRA2 domain  
137 and L1 in FhaC<sup>C195+C224</sup>.

138

### 139 **Conformational changes of FhaC in a lipid environment**

140 We made use of electron paramagnetic resonance (EPR) and nuclear magnetic resonance (NMR)  
141 spectroscopies for their ability to characterize molecular structure and dynamics as well as minor  
142 conformational states on complementary time scales and distance ranges (Mittermaier & Kay,

143 2009; Torricella et al., 2021). In addition, both techniques can be applied to proteins in lipid  
144 bilayer environments i.e., liposomes and lipid nanodiscs (Liang & Tamm, 2016; Sahu & Lorigan,  
145 2020).

146 We recorded NMR spectra of FhaC in liposomes and nanodiscs (Bayburt et al., 1998), using  
147 solid- and solution-state NMR techniques, respectively. To render the 61-kDa protein more  
148 accessible to NMR spectroscopy, we resorted to perdeuteration and specific  $^1\text{H}$ ,  $^{13}\text{C}$ -isotope  
149 labeling of isoleucine (Ile)  $\delta_1$  methyl groups (Ruschak & Kay, 2010). Since the 15 Ile residues of  
150 FhaC are well distributed across all structural elements of the protein (Figure 3A), we expected  
151 this reduced labeling scheme to nevertheless be able to report on larger-scale structural transitions  
152 of FhaC. Signals from all Ile residues could be identified and assigned by Ile-to-Val mutations or  
153 paramagnetic relaxation enhancement experiments (Amero et al., 2011; Venditti et al., 2011)  
154 (Figure 3B,C). Broader signals in solid-state spectra are likely in part due to the choice of a sample  
155 temperature of  $17^\circ\text{C}$ , below the phase transition for the majority of *E. coli* polar lipids, to achieve  
156 longer-term sample stability and better signal-to-noise in dipolar coupling-based experiments.  
157 However, we also suspect that FhaC exhibits conformational heterogeneity in proteoliposomes,  
158 whereas it is more constrained in a nanodisc environment (see below).

159 Signal intensities of the Ile  $\delta_1$  methyls varied in both environments, informing on local  
160 dynamics in the protein. Ile<sup>14</sup> was only visible in scalar coupling-based spectra, likely due to sub-  
161  $\mu\text{s}$  time scale motion towards the N-terminus of the protein, precluding its detection in spectra  
162 based on dipolar couplings. The signal of Ile<sup>548</sup> in  $\beta$ -strand B16 at the barrel seam consistently  
163 exhibited low intensity in both scalar and dipolar coupling-based spectra, indicating exchange  
164 dynamics on the  $\mu\text{s}$  to  $\text{ms}$  time scale in this region. Moreover, the absence of through-space  
165 correlations for all but the shortest distances expected from the crystal structure (Figure 3

166 Supplement 1) also supports the notion of dynamics in FhaC, at least at the level of Ile side chains.  
167 However,  $^{13}\text{C}$  rotating-frame ( $R_{1\rho}$ ) relaxation dispersion experiments probing exchange between  
168 states with different chemical shifts on the  $\mu\text{s}$  time scale (Lewandowski et al., 2011; Ma et al.,  
169 2014) yielded statistically flat dispersion profiles (Figure 3 Supplement 2), indicating that the  
170 conformational changes detected in FhaC by S-S cross-linking and EPR experiments likely occur  
171 on slower time scales, or are not reflected in sizable Ile  $\text{C}\delta_1$  chemical shift changes.

172 Continuous-wave EPR (CW-EPR) spectroscopy in X-band with site-directed spin labeling  
173 typically detects transitions on time scales between 100 ps and 100 ns (Garcia-Rubio, 2020;  
174 Organesyan et al., 2017), but also transitions beyond that time scale since distinct spin label  
175 environments may generate spectral components reflecting conformational ensembles. Different  
176 structural states of a protein that exchange with each other can thus be accessed by multi-  
177 component spectral simulations. Among the few sites of FhaC accessible to nitroxide spin labelling  
178 (Guerin et al., 2014; Guerin et al., 2015), we selected positions 33 in the linker, 187 and 195 in the  
179 POTRA2 domain, and 503 in the extracellular loop L7 to engineer pairs of Cys residues and  
180 labeled them with (1-oxyl-2,2,5,5-tetramethyl- $\Delta^3$ -pyrroline-3-methyl) methanethiosulfonate  
181 (MTSL). This yielded FhaC variants FhaC<sup>33R1+503R1</sup>, FhaC<sup>187R1+503R1</sup>, and FhaC<sup>195R1+503R1</sup>, where  
182 R1 represents the spin label. EPR spectra of the proteins in  $\beta$ -octyl glucoside (bOG) micelles  
183 revealed hyperfine coupling values indicating contributions of several components, i.e., distinct  
184 mobility regimes for one or both probes (Figure 4). The spectral features of FhaC<sup>187R1+503R1</sup> and  
185 FhaC<sup>195R1+503R1</sup> both showed fast- and intermediate-motion components as expected for spin probes  
186 exposed to solvent, whereas those of FhaC<sup>33R1+503R1</sup> indicated a slow-motion regime, most likely  
187 at site 33 as observed earlier (Guerin et al., 2014).



188 The CW-EPR spectra of FhaC<sup>195R1+503R1</sup> and FhaC<sup>187R1+503R1</sup> in proteoliposomes exhibited  
189 signal broadening and indicated several conformers (Figure 4; Figure 4 Supplement 1), providing  
190 evidence for a dynamic protein that populates several conformational states. Spectral splitting  
191 values around 7.0 mT reveal very slow motions of the probe, suggesting a change of its  
192 environment most likely at positions 187 and 195 rather than 503, since no large spectral changes  
193 between bOG and lipid environments were detected for FhaC<sup>33R1+503R1</sup>. Such reduced mobility  
194 might indicate interactions of the spin probes with the lipid bilayer. Spectra of FhaC were similar  
195 in nanodiscs and in bOG, suggesting that for FhaC, the former do not fully reproduce the  
196 membrane environment (Figure 4 Supplement 1). Thus, although residues 187 and 195 in the  
197 POTRA2 domain are solvent-exposed in the crystal structure of FhaC, our EPR data highlight a  
198 conformation where they may be close to the lipid bilayer.

199

200 **Shorter-than-expected distances between POTRA2 domain and extracellular side with**  
201 **Pulsed Electron Double Resonance (PELDOR) spectroscopy**

202 Spin–spin distances between 1.8 and 8 nm in membrane proteins are accessible with PELDOR  
203 spectroscopy and can provide insight into non-homogeneous conformational ensembles (Jeschke,  
204 2012). For FhaC<sup>195R1+503R1</sup> and FhaC<sup>187R1+503R1</sup> in bOG, the main populated states correspond to  
205 distance distributions between the two spin probes centered at 7.2 nm and 5.6 nm, consistent with  
206 distances calculated using MTSL rotamer libraries attached to the corresponding residues of the  
207 FhaC crystal structure (Figure 5A; Figure 5 Supplement 1). For FhaC<sup>33R1+503R1</sup> a broader distance  
208 distribution was observed, with contributions centered at 4.2 nm and 4.6 nm as also predicted by  
209 rotamer libraries (Figure 5 Supplement 1) (Jeschke, 2013, 2020).

210 In addition to the expected long distance, shorter distance distributions centered at 2.5 nm and  
211 3.5 nm were observed for FhaC<sup>195R1+503R1</sup> in proteoliposomes that can be attributed to conformers  
212 with the two probes closer to one another than in the crystal structure conformation (Figure 5B;  
213 Figure 5 Supplement 2). PELDOR experiments also showed additional peaks in the distance  
214 distributions for FhaC<sup>33R1+503R1</sup> and FhaC<sup>187R1+503R1</sup> in proteoliposomes, with shorter distances than  
215 expected for the latter and both shorter and longer distances for the former (Figure 5B). Thus, for  
216 the three variants, insertion in liposomes leads to the formation of multiple different conformations.

217 The point mutation Asp<sup>492</sup>Arg disrupts a conserved salt bridge between L6 and the inner barrel  
218 wall and induces conformational changes in FhaC (Guerin et al., 2015). We introduced the  
219 Asp<sup>492</sup>Arg substitution in FhaC<sup>195R1+503R1</sup> and performed EPR experiments. They showed an  
220 increased proportion of species characterized by slow probe motions and short inter-spin distances  
221 (Figure 5 Supplement 3). Hydrogen-deuterium exchange MS experiments confirmed the increased  
222 conformational flexibility in several regions of FhaC<sup>R492</sup> compared to its wild type (wt) counterpart  
223 (Figure 5 Supplement 3).

224 Taken together, our results support the idea that the POTRA2 domain can undergo large  
225 conformational changes, which are likely facilitated by the rupture of the L6-inner barrel wall  
226 interaction. The H1-POTRA1 linker can also adopt several conformations and move towards the  
227 cell surface.

228

### 229 **Evidence for proximity between the b5-b6 hairpin of the POTRA2 domain and the barrel** 230 **using paramagnetic relaxation enhancement (PRE) NMR**

231 To complement the EPR data, we performed PRE experiments in which a single MTSL probe is  
232 attached to an engineered Cys in the protein, and attenuation of NMR signals of nuclei within a

233 radius of about 25 Å around the MTSL probe can be detected even if they only transiently approach  
234 the probe (Battiste & Wagner, 2000). We chose residue 220 in the extracellular loop L1 for this  
235 experiment. Intensities of Ile  $\delta_1$  methyl signals in FhaC<sup>220R1</sup> measured by solid-state NMR in  
236 proteoliposomes were referenced to those in a sample with a diamagnetic MTSL analog attached  
237 to the same residue, FhaC<sup>220R1dia</sup> (Nadaud et al., 2007). Comparison of the signal intensity ratios  
238 obtained for different FhaC residues allows to determine whether a signal is more attenuated than  
239 would be expected from the crystal structure, indicating a residue approaching the probe more  
240 closely. Nevertheless, as the resultant para- versus diamagnetic signal intensity ratios do not  
241 necessarily normalize to 1 chiefly due to variations in the amount of labeled protein between the  
242 samples, we did not attempt to extract quantitative distance measurements from these data.

243 Ile<sup>114</sup>, Ile<sup>136</sup>, and Ile<sup>141</sup> in the POTRA1 and POTRA2 domains are more than 38 Å apart from  
244 the position of the paramagnetic MTSL on Cys<sup>220</sup> according to an MTSL ensemble modeled onto  
245 residue 220 in the crystal structure (Hagelueken et al., 2015) (Figure 6 Supplement Table 1). In  
246 agreement with our other data that do not implicate these residues in any large-scale  
247 conformational changes, we found the highest para- versus diamagnetic intensity ratios (i.e., no  
248 attenuation) for their NMR signals (Figure 6A,B). Conversely, Ile<sup>27</sup>, Ile<sup>441</sup>, Ile<sup>506</sup>, and Ile<sup>548</sup> are  
249 expected to be within 16 to 25 Å of the paramagnetic center; correspondingly, their signals were  
250 attenuated. In agreement with expected distances to the paramagnetic center of 12 and 32 Å for  
251 Ile<sup>252</sup> and Ile<sup>420</sup>, respectively, the overlapped signal due to these two residues exhibited  
252 intermediate attenuation. Finally, the signal of Ile<sup>188</sup> in strand b5 of the POTRA2 domain was  
253 attenuated more than would be expected for a residue at 35 Å distance from the paramagnetic  
254 center. The difference in attenuation with respect to the reference residues Ile<sup>114</sup>, Ile<sup>136</sup>, and Ile<sup>141</sup>  
255 is significant ( $p < 0.05$ ). In line with our results from cross-linking and EPR spectroscopy, this

256 result thus supports the notion that regions of the POTRA2 domain encompassing strand b5 can  
257 approach the extracellular loops. Conversely, signals from the POTRA2 H4 helix (Ile<sup>172</sup>, Ile<sup>176</sup>,  
258 Ile<sup>179</sup>) were not significantly attenuated compared to reference signals.

259 Notably, we did not obtain indications for alternative conformers in FhaC reconstituted into  
260 nanodiscs with EPR or NMR spectroscopy (Figure 6 Supplement 2). Analysis of PELDOR  
261 experiments on FhaC<sup>195R1+503R1</sup> yielded only a long distance between the spin labels, as expected  
262 from the crystal structure, and PRE experiments on FhaC<sup>195R1</sup> showed attenuation of NMR signals  
263 only within the POTRA2 domain. Along with smaller linewidths of FhaC NMR signals in  
264 nanodiscs compared to liposomes (Figure 3B,C), these findings further support the idea that the  
265 nanodisc environment constrains the conformational space accessible to FhaC.

266

### 267 **Interactions of portions of the POTRA2 domain with the $\beta$ barrel by native mass** 268 **spectrometry**

269 Our data imply that the POTRA2 domain undergoes some breaking up in the secretion cycle. We  
270 thus investigated its lability by using structural MS-based approaches in bOG micelles (Figure 7).  
271 Native MS analysis of FhaC revealed a monomer that could be stripped of bOG at 60 V, a relatively  
272 low collision energy (CE), and that displayed a narrow charge state distribution between 14+ and  
273 19+ indicative of a folded protein in a single conformation (Figure 7 Supplement 1).

274 We used collision-induced unfolding (CIU) (Tian et al., 2015) to characterize the stability and  
275 the organization of the FhaC domains. FhaC displayed two transitions at 60 V and 120 V as shown  
276 by the increases of collision cross section (CSS) values (Figure 7C). As the number of transitions  
277 in the gas phase can generally be related to the number of domains of a protein (Zhong et al., 2014),  
278 and extra-membrane domains are more likely to experience early unfolding than domains

279 embedded in detergent or lipids due to collisional cooling (Barrera et al., 2009), those transitions  
280 might be caused by unfolding of the POTRA domains and/or ejection and unfolding of H1. Control  
281 CIU experiments with other *B. pertussis* outer membrane proteins (OMPs) with small soluble  
282 domains inside their  $\beta$  barrels, the TonB-dependent transporter BfrG and the translocator domain  
283 of an autotransporter, SphB1- $\alpha\beta$ , showed a single unfolding transition at low voltage, which likely  
284 corresponds to unfolding of these soluble domains (Figure 7 Supplement 2). Thus, the  $\beta$  barrels of  
285 these three proteins likely remain structurally intact at high activation conditions, most likely due  
286 to strong hydrogen bonding networks.

287 To further investigate whether the CIU transitions observed for FhaC stem from unfolding of  
288 the POTRA domains or ejection of the H1 helix, we studied the CIU pathway of FhaC<sup>C4+C391</sup> in  
289 which H1 is locked inside the barrel by an S-S bond and thus cannot move out (Guerin et al., 2014).  
290 FhaC<sup>C4+C391</sup> exhibited the same transitions as wt FhaC, although the second unfolding event was  
291 delayed by 30 V and the overall CCS value was increased by 50 Å<sup>2</sup> (Figure 7 Supplement 3). As  
292 CIU is unlikely to break S-S bonds (Tian et al., 2015), comparison of these unfolding pathways  
293 suggests that the two transitions correspond to successive unfolding of the POTRA domains, with  
294 the barrel remaining intact in those conditions. H1 stays inside the barrel or its unfolding barely  
295 registers in the CCS values. The delay of the second unfolding transition for FhaC<sup>C4+C391</sup> suggests  
296 that locking H1 in the barrel stabilizes one of the POTRA domains, although from the data we  
297 cannot discern which one.

298 We next tested the possibility that portions of the POTRA2 domain might bind to the  $\beta$  barrel,  
299 probably along strands B1 or B16 upon opening of the lateral seam. Using native MS, we assessed  
300 the binding of synthetic peptides that correspond to various periplasmic portions of FhaC,  
301 including b5-b6 (2815 Da), b4+L (*i.e.*, b4 followed by the b4-H3 linker; 2210.5 Da) and L+H4

302 (*i.e.*, the H3-H4 linker followed by H4; 2836 Da) of the POTRA2 domain, Fha-NT (2178.5 Da),  
303 the N-terminal  $\beta$  hairpin of the FhaB transport substrate, b2-b3 of the POTRA1 domain (2496 Da),  
304 and Lk (2597 Da), a non-structured peptide from the linker region between H1 and the POTRA1  
305 domain (Figure 8; Figure 8 Supplement 1). The same experiments were performed with SphB1-  
306  $\alpha\beta$  to correct for non-specific binding, which might occur in native MS experiments due to artifacts  
307 induced by interaction with the detergent during the electrospray process (Landreh et al., 2016).  
308 Fha-NT, b4+L and b5-b6 exhibited binding to FhaC, with b5-b6 binding at the highest level and  
309 in two copies, but markedly less to the FhaC<sup>C4+C391</sup> variant (Figure 8A-C; Figure 7 Supplement 3).

310 We assessed structural changes induced by peptide binding using native ion-mobility (IM)  
311 MS. At low CE (*i.e.*, no activation), all three peptides increased the CCS of the compact state of  
312 FhaC by rather small increments of 91-92 Å<sup>2</sup> (Figure 9; Figure 9 Supplement 1). However, upon  
313 increasing the activation conditions, Fha-NT and b4+L no longer increased the CCS of FhaC,  
314 compared to the unbound protein. In contrast, the b5-b6 peptide caused an increase in CCS values  
315 both at low and high collisional activation, suggesting that a structural change was induced upon  
316 peptide binding and that the peptide was bound to a region that remains folded in these conditions  
317 (Figure 9). As our CIU studies suggest that the POTRA domains likely unfold at high CE, the  
318 effect of b5-b6 on the CCS might thus stem from peptide binding to the  $\beta$  barrel. The same  
319 experiment with FhaC<sup>C4+C391</sup> showed a lower level of peptide binding, which nevertheless caused  
320 a similar increase of CCS at both low and high energies, like with wt FhaC (Figure 9C and Figure  
321 7 Supplement 3). This supports the model that the b5-b6 hairpin the POTRA2 domain undergoes  
322 a large reorientation to interact with the barrel, facilitated by the ejection of H1. Given the  
323 amphipathic nature of this hairpin, it might align with an edge of the open  $\beta$ -barrel seam.

324

325 **DISCUSSION**

326 As Omp85 transporters are thought to perform their functions in the absence of an energy source  
327 in the periplasm, their postulated conformational cycling must involve low energy barriers between  
328 conformers, as reported for BamA (Xiao et al., 2021). Here, we obtained evidence for large  
329 conformational changes of FhaC that involve portions of the POTRA2 domain approaching the  
330 lipid bilayer and the extracellular side of the protein. Conformational changes of FhaC occur  
331 independently of the presence of the substrate, indicating that such dynamics is an intrinsic  
332 structural feature of the protein, most likely with implications for its function. Notably, the  
333 conformational states appear to be in slow equilibrium, as with BamA (Hartmann et al., 2018).

334 All structural elements of TpsB transporters are connected with one another, structurally and  
335 functionally, and therefore their motions are likely to be coupled (Guerin et al., 2014; Guerin et  
336 al., 2020; Guerin et al., 2015; Maier et al., 2015). In the resting conformation, H1 and L6 interact  
337 with the barrel wall, H1 with L1, the H1-POTRA1 linker with the POTRA domains, and the  
338 POTRA2 domain with the periplasmic side of the barrel (Guerin et al., 2020; Maier et al., 2015).  
339 In the secretion process, L6 breaks its connection with the barrel wall, H1 moves towards the  
340 periplasm, and part of the B1-B16 seam unzips (Guerin et al., 2014; Guerin et al., 2020; Guerin et  
341 al., 2015). Here we have shown that these motions are also coupled to substantial conformational  
342 changes of the POTRA2 domain. In CdiB<sup>Ab</sup>, coordinated motions of the first barrel strand B1 and  
343 the extracellular loops L1, L2 and L6 favor the active conformation of the transporter (Guerin et  
344 al., 2020). Based on this and previous work we thus propose that concerted conformational changes  
345 lead to channel opening and substrate entry.

346 Lateral opening of the barrel is a common feature of Omp85 transporters. For BamA and Sam50,  
347 the B1 strand at the lateral gap templates folding of client proteins by  $\beta$  augmentation (Doyle &

348 Bernstein, 2019; Höhr et al., 2018, Tomasek, 2020 #30). In TpsB transporters, lateral opening is  
349 required for secretion (Guerin et al., 2020), and this work indicates that it is coupled to motions of  
350 part of the POTRA2 domain towards the  $\beta$  barrel. EPR, NMR and S-S cross-linking data revealed  
351 the proximity of parts of the POTRA2 domain to the lipid bilayer or to the extracellular side of  
352 FhaC in some conformers, and structural MS experiments showed the binding of the POTRA2 b5-  
353 b6 hairpin peptide to the  $\beta$  barrel under conditions in which the POTRA domains are very likely  
354 unfolded. This binding might involve  $\beta$  augmentation of the B1 strand in an unzipped  
355 conformation by the b5-b6 hairpin, as suggested by our IM-MS results and by the *in vivo* formation  
356 of an S-S bond between the tip of that hairpin and the extracellular loop L1. The b5-b6 sequence  
357 fits ideally in the open seam, with its amphipathic nature and suitable charge partitioning. By  
358 utilizing intrinsic protein dynamics, TpsB transporters mediate protein secretion without the need  
359 for cofactors or external energy sources. Although such conformational changes are unprecedented  
360 in the Omp85 superfamily, divergent functional evolution has necessarily implied specific  
361 mechanistic adaptations.

362 How the motions of the POTRA2 domain and the H1 helix are coordinated remains  
363 speculative. According to MD simulations on CdiB<sup>Ab</sup>, breaking the connections between the loops  
364 L1 and L6 favors expulsion of H1 from the barrel, which elicits barrel unzipping between B1 and  
365 B16 (Guerin et al., 2020). Disruption of the B1-B16 seam might trigger a swing motion of the b5-  
366 b6 hairpin of the POTRA2 domain toward the open seam, enlarging the barrel by  $\beta$  augmentation.  
367 Importantly, the groove between H4 and b5 in the POTRA2 domain is a binding site for the  
368 conserved TPS domain of the FhaC substrate, FhaB (Delattre et al., 2011), and therefore such a  
369 conformational change of the POTRA2 domain might hoist a portion of the bound substrate  
370 towards the barrel. As the alternative conformations of FhaC exist in the absence of its substrate,



371 the conformational changes occur spontaneously, on a slow time scale (ms or above). The  
372 incoming FhaB substrate would interact with conformations in which its binding site on FhaC is  
373 accessible in the periplasm (Maier et al., 2015) and piggyback on spontaneous motions of its  
374 transporter to initiate secretion, thereby displacing the equilibrium between conformations. Recent  
375 work has indicated that energy may be transduced from the inner membrane to the BAM complex  
376 through the protonmotive force-utilizing SecDF complex (Alvira et al., 2020). One cannot rule out  
377 that the intrinsic conformational changes of FhaC *in vivo* are similarly enhanced by an energy-  
378 transducing mechanism. The observation that portions of the linker also approach the extracellular  
379 loops as seen in the cross-linking experiments might reflect futile conformational changes  
380 involving the linker in place of the substrate, in the absence of the latter. Notably, evidence for the  
381 last part of the linker reaching the cell surface was obtained previously (Guedin et al., 2000).

382 As the POTRA2 domain partially breaks up during secretion, it must reassemble after  
383 secretion is completed. This may be mediated by the interactions of the H3 helix and the barrel-  
384 proximal end of b5 of the POTRA2 domain with the periplasmic turn T1 of the barrel, which are  
385 important for FhaC activity. These fixed points of the POTRA2 domain may ensure that FhaC can  
386 regain its resting conformation after secretion, which is necessary to limit OM permeability.  
387 Consistent with this hypothesis, disrupting the conformation of the periplasmic turn T1 yielded  
388 transient, very large channels as detected in electrophysiology experiments (Méli et al., 2006). Our  
389 model for the mechanism of protein transport in TPS systems recapitulates currently available data  
390 and establishes mechanistic links between TpsBs and other Omp85 transporters.

391

## 392 **Materials and Methods**

### 393 **Strains and plasmids**

394 *E. coli* JCB570 or JCB571 (*dsbA::kan*) were used for low level expression of FhaC and *E. coli*  
395 BL21(DE3-*omp5*) for overexpression. For peptide mapping FhaC<sup>C48+C224</sup> and FhaC<sup>C195+C224</sup> were  
396 overexpressed in BL21(DE3-*omp5 dsbA::kan*), which was constructed as described in (Derbise et  
397 al., 2003). Point mutations in *fhaC* were generated using the QuikChange II XL Kit (Agilent, Les  
398 Ulis, France) on pFc3 (Guedin et al., 2000). Overexpression of FhaC for purification was  
399 performed from pET22 or pET24 plasmids (Clantin et al., 2007). ptacFha44-His codes for the first  
400 80 kDa of the FhaC substrate FhaB, called Fha44, followed by a 6-His tag. It was constructed by  
401 adding a 1.2-kb Sal-BamHI fragment of the *fhaB* gene into the same sites of the ptacNM21k-His  
402 plasmid (Guerin et al., 2015). pFJD63 codes for FhaC under the control of the P<sub>BAD</sub> promoter  
403 (Guedin et al., 1998). Its derivatives were constructed by ligating the XhoI-HindIII and XhoI-XbaI  
404 fragments of pFJD63 with the XbaI-HindIII *fhaC* fragments with the relevant mutations from the  
405 pFc3 derivatives. pMSP1D1 and pMSP1E3D1 were obtained from Addgene (Watertown, MA,  
406 USA). pSphB1 $\alpha\beta$  is a derivative of pT7SB $\alpha\beta$  (Dé et al., 2008) with a 6-His tag. To construct  
407 pT7bfrG-H, the sequence corresponding to the mature protein was PCR amplified and inserted in  
408 pFJD138 (Méli et al., 2006) after the signal-peptide and 6-His tag sequences.

409

#### 410 ***In vivo* assays**

411 To monitor S-S bond formation *in vivo*, the pFc3 variants were introduced in *E. coli* JCB571. The  
412 recombinant bacteria were grown at 37°C in minimum M9 medium containing 0.1%  
413 casaminoacids under agitation. The cells were collected by centrifugation when the optical  
414 densities at 600 nm (OD<sub>600</sub>) of the cultures reached 0.8. The cell pellets were resuspended in 50  
415 mM sodium (pH 6.8) containing 10 mM N-ethylmaleimide and lysed using a Hybaid ribolyzer  
416 apparatus (50 sec at speed 6). The membranes were collected by ultracentrifugation of the clarified

417 lysates at 90,000 g for 1 h. The pellets were resuspended in loading buffer without reducing agent  
418 and separated into two aliquots, with DTE added at 25 mM to one of them before heating at 70°C  
419 for 10 min. FhaC was detected using anti-FhaC antibodies (Delattre et al., 2011) with alkaline  
420 phosphatase development for 15 min.

421 For the secretion assays, overnight cultures of *E. coli* JCB570 or JCB571 harboring a pFJD63  
422 derivative and ptacFha44-His were diluted to OD<sub>600</sub> of 0.3 in LB and grown under agitation with  
423 0.01% arabinose for 20 min to produce FhaC. The bacteria were collected by centrifugation,  
424 resuspended in prewarmed LB without arabinose and grown to OD<sub>600</sub> of 0.8 before adding IPTG  
425 at 1 mM to induce the expression of Fha44. Culture aliquots were collected 5 and 20 min thereafter  
426 and placed on ice. After centrifugation to harvest the bacteria, Fha44 was affinity-purified from  
427 the supernatants with Ni-NTA beads (Qiagen, Courtaboeuf, France). The membrane extracts were  
428 prepared and FhaC was detected as above. Fha44 was detected by immunoblotting using anti-6His  
429 antibodies, the ECL kit of Amersham (Merck, St Quentin-Fallavier, France) and the Amersham  
430 Imager 600 (GE) with 1 sec exposure. The amounts of Fha44 in supernatants were quantified with  
431 ImageJ.

432

### 433 **Protein Purification and spin labeling**

434 The production and purification of the FhaC derivatives was performed as described (Guerin et al.,  
435 2014). Expression for NMR experiments was performed in M9 minimal medium in D<sub>2</sub>O, 2.5 g/L  
436 <sup>2</sup>H-glucose (Sigma, St Quentin-Fallaviers, France), 1g/L <sup>15</sup>N-NH<sub>4</sub>Cl, 1g/L <sup>15</sup>N,<sup>2</sup>H-isogro (Sigma)  
437 and <sup>13</sup>C- $\alpha$ -ketobutyric acid (Sigma) to achieve u-(<sup>2</sup>H,<sup>15</sup>N), Ile- $\delta_1$ (<sup>13</sup>CH<sub>3</sub>) isotope labeling (Ruschak  
438 & Kay, 2010). For spin labeling, 3 mM tris(2-carboxyethyl)phosphine (TCEP, Sigma) was added  
439 to the detergent extract before ion exchange chromatography. The FhaC-containing fractions were

440 mixed with a 10-fold molar excess MTSL or its diamagnetic analogue (1-Acetoxy-2,2,5,5-  
441 tetramethyl- $\delta$ -3-pyrroline-3-methyl) methanethiosulfonate (Toronto Research Chemicals, North  
442 York, ON, Canada) at 15°C with gentle agitation for 16 hours. Excess MTSL was removed by  
443 chromatography. SphB1- $\alpha\beta$  and BfrG were produced from *E. coli* BL21(DE3-*omp5*) and purified  
444 from bOG extracts using Ni<sup>2+</sup> affinity chromatography. For BfrG 300 mM NaCl was added to  
445 improve solubility.

446

#### 447 **Preparation of liposomes and nanodiscs and protein reconstitution**

448 Small unilamellar vesicles (SUVs) from *E. coli* polar lipids, dimyristoyl phosphatidyl choline  
449 (DMPC) or mixtures of DMPC and dimyristoyl phosphatidyl glycerol (DMPG) (Avanti, Interchim,  
450 Montluçon, France) at the indicated ratios were prepared as described (Guerin et al., 2014). The  
451 SUVs were mixed with FhaC variants at lipid:protein molar ratios of approx. 2500:1 for EPR and  
452 200:1 for NMR experiments, respectively, at room temperature, with gentle agitation for one hour.  
453 The proteoliposomes were formed by removal of detergent with the progressive addition of  
454 Biobeads SM2 (Bio-Rad), and the proteoliposomes were collected by ultracentrifugation. All steps  
455 were performed under argon. Final buffer concentrations after mixing FhaC and liposomes were  
456 about 12.5 mM each of Tris and NaP<sub>i</sub>, 150 mM NaCl, pH 6.7.

457 Nanodiscs were prepared with the MSP1D1 and MSP1E3D1 scaffold proteins (Ritchie et al.,  
458 2009) produced in *E. coli* BL21(DE3), with an induction of 3 h at 28°C. For NMR experiments,  
459 scaffold proteins were expressed in M9 minimal medium in D<sub>2</sub>O using <sup>2</sup>H-glucose as carbon  
460 source to suppress their signals in the (<sup>1</sup>H,<sup>13</sup>C)-based NMR spectra. The bacteria were broken using  
461 a French press in 50 mM Tris-HCl (pH 8), 300 mM NaCl (TN buffer), 1% Triton X100 (TNX  
462 buffer), and the clarified lysates were subjected to Ni<sup>2+</sup> affinity chromatography. After successive

463 washes in TNX, TN buffer with 50 mM cholate, 20 mM and 50 mM imidazole, the proteins were  
464 eluted in TN buffer with 400 mM imidazole, concentrated by ultrafiltration and dialyzed against  
465 20 mM Tris-HCl (pH 8), 200 mM NaCl and 0.1 mM EDTA. DMPC and DMPG at a 2:1 ratio were  
466 solubilized in chloroform, lyophilized overnight and resuspended to 25 mM in 20 mM Tris-HCl  
467 (pH 7.5), 100 mM NaCl, 0.5 mM EDTA, 50 mM cholate. For NMR experiments, deuterated ( $d_{54-}$ )  
468 DMPC and DMPG (Cortecnet, Voisins-le-Bretonneux, France) were used. FhaC, the scaffold  
469 protein and the lipids were mixed at a ratio of 1:3:180, cholate was added to 15 mM, and incubation  
470 performed for 1 h at room temperature. Biobeads were added progressively, and the incubation  
471 was continued at 4°C overnight. The nanodiscs were collected by ultracentrifugation and  
472 concentrated by ultrafiltration. For NMR experiments, the buffer was exchanged to 100 mM  $\text{NaP}_i$   
473 in  $\text{D}_2\text{O}$  pH\* 7.2 using a 2-ml ZebaSpin column (7 kDa MWCO).

474

#### 475 **NMR experiments**

476 For solid-state NMR experiments on FhaC variants reconstituted into liposomes, the  
477 proteoliposomes collected by ultracentrifugation were transferred to 1.3 mm magic-angle-spinning  
478 (MAS) solid-state NMR rotors (Bruker Biospin, Wissembourg, France) using an  
479 ultracentrifugation device (Bertini et al., 2012) (Giotto Biotech, Sesto Fiorentino, Italy) in a  
480 Beckman ultracentrifuge (SW 32 Ti rotor, 77,000 x g, 12°C, 30 – 60 min). NMR experiments were  
481 performed on spectrometers operating at 800 and 950 MHz  $^1\text{H}$  Larmor frequency (18.8 and 22.3  
482 T magnetic field) (Bruker Biospin) at a MAS frequency of 50 kHz. Sample temperature was kept  
483 at about 17°C as judged by the chemical shift of the bulk water resonance. Spectra were indirectly  
484 referenced to 2,2-dimethyl-2-silapentane-5-sulfonate (DSS) via the lipid methylene proton  
485 resonance, which appears at 1.225 ppm under our experimental conditions. Typical pulse lengths

486 for  $^1\text{H}$  and  $^{13}\text{C}$  hard  $90^\circ$  pulses were 2.1 and 3.8  $\mu\text{s}$ , respectively. For cross-polarization (CP), field  
487 strengths were 21 and 30 kHz for  $^1\text{H}$  and  $^{13}\text{C}$ , respectively (n=1 double-quantum Hartmann-Hahn  
488 condition), with a 50-to-100% ramp on the  $^1\text{H}$  radiofrequency (RF) field and a duration of 1.5 ms.  
489  $^1\text{H}$ -detected 2D  $^{13}\text{C}$ - $^1\text{H}$  dipolar hCH correlation spectra (Barbet-Massin et al., 2014) were typically  
490 recorded with 1600 data points and a spectral width of 40 ppm in the direct  $^1\text{H}$  dimension and 100  
491 to 140 data points and a spectral width of 13 ppm in the indirect  $^{13}\text{C}$  dimension. For water  
492 suppression, the MISSISSIPPI scheme (Zhou & Rienstra, 2008) at 15 kHz  $^1\text{H}$  RF field with a  
493 duration of typically 200 ms was employed. For the 2D hChH correlation spectrum, a  $^1\text{H}$ - $^1\text{H}$   
494 mixing time of 6.4 ms using radio frequency driven recoupling (Bennett et al., 1992) with a  $^1\text{H}$   
495 field strength of 120 kHz was applied between back-CP and acquisition.  $^{13}\text{C}$   $R_{1\rho}$  spectra  
496 (Lewandowski et al., 2011; Ma et al., 2014) were recorded in a pseudo-3D fashion, with the  $^{13}\text{C}$   
497 spinlock period inserted between the initial CP and the  $^{13}\text{C}$  indirect evolution of the hCH sequence.  
498 Spinlock field strengths from 1.2 to 10 kHz were used, and 5 spinlock durations from 2.5 to 80 ms  
499 with one repeated value were recorded for each spinlock. The spinlock carrier frequency was kept  
500 at the center of the isoleucine  $\delta_1$  methyl  $^{13}\text{C}$  region, as in all other hCH correlation spectra. A  $^1\text{H}$   
501  $180^\circ$  pulse was inserted in the middle of the spinlock period to suppress chemical shift anisotropy  
502 / dipolar coupling cross-correlated relaxation (Kurauskas et al., 2016). Solid-state PRE NMR  
503 experiments were recorded on FhaC samples with either a paramagnetic MTSL tag or a  
504 diamagnetic MTSL analogue (Nadaud et al., 2007) attached to a Cys, reconstituted into *E. coli*  
505 polar lipid liposomes. Standard dipolar 2D hCH correlation spectra were recorded.

506 Solution-state NMR experiments on FhaC in nanodiscs were conducted on a 900 MHz  
507 spectrometer (Bruker Biospin) at  $32^\circ\text{C}$  sample temperature. Standard  $^{13}\text{C}$ - $^1\text{H}$  heteronuclear  
508 multiple-quantum coherence (HMQC) or SOFAST-HMQC (Schanda & Brutscher, 2005)

509 experiments were recorded with 2048 and 150 data points and spectral widths of 14 and 7.4 ppm  
510 in direct  $^1\text{H}$  and indirect  $^{13}\text{C}$  dimensions, respectively. For PRE experiments, standard  $^{13}\text{C}$ - $^1\text{H}$   
511 HMQC spectra were recorded on a FhaC<sup>195R1</sup> sample before and after reduction of the  
512 paramagnetic MTSL tag with a 10-fold molar excess of ascorbic acid (Battiste & Wagner, 2000).

513 NMR spectra were processed with TopSpin 4.0.3 (Bruker Biospin) or NMRPipe (Delaglio et  
514 al., 1995) and analyzed with Sparky (Lee et al., 2015) or CcpNMR (Vranken et al., 2005). For the  
515 relaxation dispersion curves, effective transverse relaxation rates  $R_{2,\text{eff}}$  (comprising intrinsic  
516 transverse relaxation rate  $R_{2,0}$  and any exchange contribution  $R_{\text{ex}}$ ) were extracted from  
517 experimental  $R_{1\rho}$  values using separately recorded  $R_1$  experiments (Palmer & Massi, 2006). For  
518 PRE experiments, ratios of peak intensities in spectra of para- and diamagnetic species (FhaC<sup>220R1</sup>  
519 and FhaC<sup>220R1dia</sup> for solid-state experiments, oxidized and reduced FhaC<sup>195R1</sup> in case of the  
520 solution-state experiments, respectively) were calculated. These para- versus diamagnetic signal  
521 intensity ratios do not normalize to 1 in our case. In the solid-state experiments, this is most likely  
522 due to variations between the samples in terms of efficiency of protein reconstitution into  
523 liposomes and total amounts of sample transferred to the NMR rotor. Both in solid and solution  
524 state, spectroscopic factors likely also play a role (incomplete longitudinal relaxation and thus  
525 lower signal-to-noise in the spectra of diamagnetic samples due to the use of short inter-scan delays  
526 of 1 s (Iwahara et al., 2007)). We have thus opted to normalize PRE ratios to the maximum ratio  
527 observed in each experiment, which was always observed in one of the residues furthest from the  
528 paramagnetic center (Ile<sup>136</sup> in FhaC<sup>220R1</sup>, Ile<sup>14</sup> in FhaC<sup>195R1</sup>). This is equivalent to normalizing  
529 signals within each spectrum to a reference signal whose intensity is unaffected by PRE effects.  
530 We then only analyzed relative signal attenuation levels, instead of attempting to extract

531 quantitative distance measures. Error bars of PRE intensity ratios were calculated based on spectral  
532 noise levels (root-mean-standard deviation of the spectral noise) using standard error propagation.

533

### 534 **EPR Experiments**

535 Continuous-wave (CW) EPR spectra were recorded at room temperature on a Bruker EMX  
536 spectrometer operating at X-band frequency (~9.8 GHz) and equipped with a Bruker ER 4123D  
537 dielectric resonator. Spectra were recorded with 100-kHz field modulation with a sweep rate of  
538 1.8 G/s and a modulation amplitude of 1 G. CW-EPR spectra were background-subtracted and  
539 baseline-corrected. Spin concentrations were calculated by double integration of the field-  
540 modulated spectrum and comparison to a standard curve of 4-hydroxy TEMPO free radical.  
541 Labeling efficiencies were calculated as the spin concentration obtained by double integration  
542 divided by the total protein concentration obtained from optical absorbance at 280 nm. Low  
543 labeling efficiencies indicated that the Cys side chains at the four sites are not fully accessible to  
544 solvent in the detergent micelle.

545 PELDOR experiments were performed at Q-band frequency (~34 GHz) using a Bruker  
546 EleXsys E580 spectrometer equipped with an overcoupled Bruker EN 5107D2 resonator. Pulses  
547 were generated with a Bruker SpinJet AWG and amplified with a 50 W TWT amplifier. The  
548 experiments were performed at 50 K and 30 K using a variable-temperature cryogen-free system  
549 (Oxford, Oxford, UK). The deadtime-free, four-pulse PELDOR sequence  $[(\pi/2)_{\text{probe}} - \tau_1 -$   
550  $(\pi)_{\text{probe}} - \tau_1 + t - (\pi)_{\text{pump}} - \tau_2 - t - (\pi)_{\text{probe}} - \tau_2 - (\text{echo})]$  was employed with a 200-ns  
551  $\tau_1$  delay and  $\tau_2$  delays ranging from 3,200 ns to 7,000 ns depending on the sample (Pannier et al.,  
552 2000). Probe pulses were 10 ns ( $\pi/2$ ) and 20 ns ( $\pi$ ) Gaussian-shaped pulses at a frequency  
553 corresponding to the maximum of the resonator response function and a magnetic field value



554 corresponding to the high-field shoulder of the echo-detected field-swept spectrum. The pump  
555 pulse was implemented as a 24-ns pulse centered at a frequency 55 MHz higher than the probe  
556 frequency and corresponding to the maximum of the nitroxide field-swept spectrum. Raw time-  
557 domain PELDOR traces were background-corrected using DeerAnalysis 2019 package (Jeschke  
558 et al., 2006), and the resulting signals were power-scaled in MATLAB to suppress sum and  
559 difference peaks arising from multispin effects. Distance distributions were then calculated from  
560 the scaled and background-corrected PELDOR traces by Tikhonov regularization. For  
561 FhaC<sup>C33R1+503R1</sup>, FhaC<sup>C187R1+503R1</sup> and FhaC<sup>C195R1+503R1</sup>, distance distributions were predicted using a  
562 pre-computed rotamer library of the MTSL spin probe attached to specific residues on the PDB  
563 structure (Jeschke, 2020).

564

### 565 **Peptide mapping of FhaC variants**

566 Purified FhaC<sup>C48+C224</sup> and FhaC<sup>C195+C224</sup> variants were subjected to non-reducing SDS-PAGE, and  
567 acrylamide bands corresponding to the oxidized forms of the two proteins were excised. They were  
568 washed with 50  $\mu$ L of acetonitrile/ $\text{NH}_4\text{HCO}_3$  (75/25) four times and dehydrated with acetonitrile  
569 (ACN), or incubated in 10 mM DTT in  $\text{NH}_4\text{HCO}_3$  for 30 min at 57°C and 30 min room  
570 temperature, followed by incubation in 55 mM iodoacetamide in 25 mM  $\text{NH}_4\text{HCO}_3$  for 20 min in  
571 the dark, 3 washes with  $\text{NH}_4\text{HCO}_3$  and dehydration with ACN performed twice. The pH of the  
572 samples was decreased to 2.0, digestion was performed with pepsin (0.01  $\mu\text{g}/\mu\text{L}$ ) (Promega,  
573 Charbonnieres-les-Bains, France) at a 1:50 enzyme:substrate ratio at 37°C for 3 hours, and the  
574 reaction was stopped by heating at 95°C for 10 min.

575 NanoLC-MS/MS analysis was performed using a nanoAcquity Ultra-Performance-LC (Waters,  
576 Manchester, UK) coupled to a Q-Exactive Plus Orbitrap mass spectrometer (Thermo Scientific,

577 Illkirch, France). Peptides were trapped on a nanoACQUITY UPLC precolumn (C18, 180  $\mu\text{m}$  x  
578 20 mm, 5  $\mu\text{m}$  particle size), and eluted from a nanoACQUITY UPLC column (C18, 75  $\mu\text{m}$  x 250  
579 mm, 1.7  $\mu\text{m}$  particle size) at a constant temperature of 60°C. Mobile phases A and B were  
580 composed of 0.1% formic acid in water and 0.1% formic acid in ACN, respectively. Peptides were  
581 eluted with gradients of B from 1 to 8% for 2 min, 8 to 35% for 58 min, 35 to 90% for 1 min, 90%  
582 for 5 min, 90 to 1% B for 1 min and a concentration of 1% B for 20 min, with a constant flow rate  
583 of 400 nL/min. The source temperature of the mass spectrometer was set to 250°C and the spray  
584 voltage at 1.8 kV. Full scan MS spectra were acquired in positive mode with a resolution of  
585 140,000, a maximum injection time of 50 ms, and an AGC target value of  $3 \times 10^6$  charges. The 10  
586 most intense multiply charged peptides per full scan were isolated using a 2 m/z window and  
587 fragmented using higher energy collisional dissociation (normalized collision energy of 27).  
588 MS/MS spectra were acquired with a resolution of 17,500, a maximum injection time of 100 ms  
589 and an AGC target value of  $1 \times 10^5$ , and dynamic exclusion was set to 60 sec. The system was  
590 fully controlled by XCalibur software v3.0.63, 2013 (Thermo Scientific) and NanoAcquity UPLC  
591 console v1.51.3347 (Waters). The MS/MS data were interpreted using a local Mascot server with  
592 MASCOT 2.5.0 algorithm (Matrix Science, London, UK). Spectra were searched with a mass  
593 tolerance of 5 ppm for MS and 0.07 Da for MS/MS data, using none as enzyme. Oxidation (+15.99  
594 Da), and carbamidomethylation (57.02 Da) were specified as variable modifications. Protein  
595 identifications were validated with a Mascot ion score above 25.

596

### 597 **HDX-MS experiments**

598 Purified wt FhaC and the FhaC<sup>R492</sup> variant were injected with an automated HDX system  
599 encompassing a CTC PAL robot (Leap Technologies, Zwingen, Switzerland), and a nanoAcquity

600 UPLC system with HDX technology (Waters). The proteins were diluted and incubated at 20 °C  
601 for different deuteration times (0.5, 2, 10, 30, and 60 min) in 10 mM K<sub>2</sub>HPO<sub>4</sub>, 10 mM KH<sub>2</sub>PO<sub>4</sub>,  
602 400 mM NaCl, 3% bOG, (pD 6,6) deuterated buffer. The exchange reaction was stopped by adding  
603 1:1 (v/v) of 2 M Guanidine-HCl, 100 mM Glycine (pH 2.2) quench buffer at 1 °C for 0.5 min.  
604 Quenched samples were then digested (100-pmole injections) through a pepsin-immobilized  
605 cartridge (Enzymate pepsin column, 300 Å, 5 µm, 2.1 × 30 mm, Waters) in 0.1% aqueous formic  
606 acid solution, and the generated peptides were trapped on UPLC ACQUITY BEH C18 VanGuard  
607 precolumn of 2.1mm I.D. × 5 mm and 1.7 µm particle diameter (Waters) at 200 µL.min<sup>-1</sup>. The  
608 peptides were then separated on an ACQUITY UPLC BEH C18 column of 1.0mm I.D. × 100 mm,  
609 1.7 µm particle diameter (Waters) at 0.1 °C with a gradient elution of A (0.1% formic acid  
610 aqueous) and B (ACN with 0.1% formic acid) [2–40% B (7 min), 40–85% B (0.5 min), and 85%  
611 B (1 min)] at a flow rate of 40 µL.min<sup>-1</sup>. Mass spectrometry analyses were conducted on a Synapt  
612 G2 HDMS (Waters) with an electrospray ionization in positive polarity, initially calibrated and  
613 using a lock-mass correction with glufibrinogen peptide. Analyses were carried out in data-  
614 independent acquisition mode (MSE, Waters) with the following parameters: ESI voltage, 3.2 kV;  
615 cone voltage, 40 V; source temperature, 80 °C; desolvation gas, nitrogen at 150 °C and 800 L.h<sup>-1</sup>;  
616 acquisition range, m/z 50–2000; scan time, 0.3 s; trap MS collision, 15 → 40 eV. MSE data were  
617 processed using ProteinLynx Global Server 2.5.3 (Waters) with a custom protein sequence library,  
618 where peptide and fragment tolerances were set automatically by PLGS, with oxidized methionine  
619 (+15.99 Da) as variable modification. Data were then processed with DynamX 3.0 (Waters). All  
620 experiments were carried out in triplicate and only peptides identified in all replicates were kept  
621 with a minimum fragment of 0.2 per amino acid, a minimum intensity of 103, a length between 5  
622 and 30 residues and a file threshold of 3. Deuterium uptakes for all identified peptides were

623 manually checked and validated. Only one charge state was kept for each peptide, and deuterium  
624 uptake was not corrected for back-exchange, represented as relative. HDX-MS results were  
625 statistically validated using a mixed effects model (MEMHDX71), with a P value set to 0.01.

626

### 627 **Native MS and ion mobility**

628 Purified FhaC was buffer exchanged into 100 mM ammonium acetate buffer, pH 6.8,  
629 supplemented with 50 mM bOG using a P6 desalting column (Biorad, Marnes-la-Coquette,  
630 France). Samples were directly infused with nano-electrospray ionization with in-house-prepared  
631 gold-coated borosilicate glass capillaries with a spray voltage of +1.4 kV. Spectra were recorded  
632 on a quadrupole TOF instrument (Synapt G2 HDMS with 32K quadrupole, Waters) optimized for  
633 transmission of native, high-m/z protein assemblies. Critical voltages and pressures throughout the  
634 instrument were 50 V, 10 V, 150 V and 15 V for the sampling cone, extraction cone, trap and  
635 transfer collision cell, respectively, with pressures of 9 mbar,  $1.47 \times 10^{-2}$  mbar and  $1.21 \times 10^{-2}$   
636 mbar for the source, trap and transfer regions unless indicated otherwise. CIU ion mobility  
637 experiments were performed with 50 V sampling cone; 50-200 V trap collision energy; 42 V trap  
638 DC bias; and 15 V transfer collision energy. Pressures throughout the instrument were 9 and  $1.46$   
639  $\times 10^{-2}$  mbar for the source and trap/transfer collision cells. All spectra were processed with  
640 Masslynx v4.1 (Waters). Collision cross section calibration was performed using GDH, ADH,  
641 ConA and PK as proteins standard as described (Allen et al., 2016). It should be noted that due to  
642 the generally lower charge states observed for membrane proteins, and the increased collision  
643 energies required (compared to soluble proteins) for gentle release of proteins from detergent  
644 micelles, the CCS values reported here are less accurate and intended for qualitative comparison  
645 rather than quantitative matching to theoretical models.

646

## 647 **Peptide binding assays**

648 Synthesized peptides were dissolved in DMSO to a final concentration of 100 mM and added to  
649 the protein sample at final concentrations of 10  $\mu$ M FhaC and 100  $\mu$ M peptide. To correct for non-  
650 specific and detergent-specific binding, SphB1- $\alpha\beta$  was run at identical concentrations and  
651 conditions. For both proteins the fraction of peptide-bound protein was calculated based on peak  
652 intensities, after which the binding to the decoy protein was subtracted to correct for non-specific  
653 binding.

654

## 655 **Acknowledgements**

656 We thank Xavier Hanouille for useful suggestions and discussions at the start of this project and  
657 Isabelle Landrieu for her support and advice. This work was funded by the Agence Nationale de  
658 Recherche grant ANR-17-CE11-0043-02 "OPEN\_BAR" to FJD and a "Projets exploratoires  
659 premier soutien (PEPS)" grant by the CNRS and the University of Lille to RS. Financial support  
660 and spectrometer access by the IR-RMN-THC FR 3050 CNRS for conducting NMR experiments  
661 at the IR-RMN platforms in Lille and Grenoble is gratefully acknowledged. EPR experiments have  
662 been performed within the national facility RENARD at the University of Lille (Federation IR-  
663 RPE 3443). Support by the Centre National de la Recherche Scientifique (CNRS), Université de  
664 Strasbourg (Unistra) and the French Proteomic Infrastructure (ProFI; ANR-10-INBS-08-03) is  
665 also acknowledged. The authors would also like to thank the IdeX program of the University of  
666 Strasbourg for funding the Synapt G2Si instrument.

667

## 668 **References**

- 669 Allen, S. J., Eaton, R. M., & Bush, M. F. (2016). Analysis of native-like ions using structures for lossless ion  
670 manipulations. *Anal Chem*, 88(18), 9118-9126. <https://doi.org/10.1021/acs.analchem.6b02089>
- 671
- 672 Alvira, S., Watkins, D. W., Troman, L., Allen, W. J., Lorriman, J. S., Degliesposti, G., Cohen, E. J., Beeby, M.,  
673 Daum, B., Gold, V. A., Skehel, J. M., & Collinson, I. (2020). Inter-membrane association of the Sec  
674 and BAM translocons for bacterial outer-membrane biogenesis. *Elife*, 9.  
675 <https://doi.org/10.7554/eLife.60669>
- 676
- 677 Amero, C., Asuncion Dura, M., Noirclerc-Savoie, M., Perollier, A., Gallet, B., Plevin, M. J., Vernet, T.,  
678 Franzetti, B., & Boisbouvier, J. (2011). A systematic mutagenesis-driven strategy for site-resolved  
679 NMR studies of supramolecular assemblies. *J Biomol NMR*, 50(3), 229-236.  
680 <https://doi.org/10.1007/s10858-011-9513-5>
- 681
- 682 Barbet-Massin, E., Pell, A. J., Retel, J. S., Andreas, L. B., Jaudzems, K., Franks, W. T., Nieuwkoop, A. J., Hiller,  
683 M., Higman, V., Guerry, P., Bertarello, A., Knight, M. J., Felletti, M., Le Marchand, T., Kotelovica,  
684 S., Akopjana, I., Tars, K., Stoppini, M., Bellotti, V., Bolognesi, M., Ricagno, S., Chou, J. J., Griffin, R.  
685 G., Oschkinat, H., Lesage, A., Emsley, L., Herrmann, T., & Pintacuda, G. (2014). Rapid proton-  
686 detected NMR assignment for proteins with fast magic angle spinning. *J Am Chem Soc*, 136(35),  
687 12489-12497. <https://doi.org/10.1021/ja507382j>
- 688
- 689 Barrera, N. P., Isaacson, S. C., Zhou, M., Bavro, V. N., Welch, A., Schaedler, T. A., Seeger, M. A., Miguel, R.  
690 N., Korkhov, V. M., van Veen, H. W., Venter, H., Walmsley, A. R., Tate, C. G., & Robinson, C. V.  
691 (2009). Mass spectrometry of membrane transporters reveals subunit stoichiometry and  
692 interactions. *Nat Methods*, 6(8), 585-587. <https://doi.org/10.1038/nmeth.1347>
- 693
- 694 Battiste, J. L., & Wagner, G. (2000). Utilization of site-directed spin labeling and high-resolution  
695 heteronuclear nuclear magnetic resonance for global fold determination of large proteins with  
696 limited nuclear overhauser effect data. *Biochemistry*, 39(18), 5355-5365.  
697 <https://doi.org/10.1021/bi000060h>
- 698
- 699 Baud, C., Guerin, J., Petit, E., Lesne, E., Dupre, E., Locht, C., & Jacob-Dubuisson, F. (2014). Translocation  
700 path of a substrate protein through its Omp85 transporter. *Nat Commun*, 5, 5271.  
701 <https://doi.org/10.1038/ncomms6271>
- 702
- 703 Bayburt, T. H., Carlson, J. W., & Sligar, S. G. (1998). Reconstitution and imaging of a membrane protein in  
704 a nanometer-size phospholipid bilayer. *J Struct Biol*, 123(1), 37-44.  
705 <https://doi.org/10.1006/jsbi.1998.4007>
- 706
- 707 Bennett, A. E., Griffin, R. G., Ok, J. H., & Vega, S. (1992). Chemical shift correlation spectroscopy in rotating  
708 solids: Radio frequency-driven dipolar recoupling and longitudinal exchange. *J. Chem. Phys.*, 96,  
709 8624-8627.
- 710

- 711 Bertini, I., Engelke, F., Gonnelli, L., Knott, B., Luchinat, C., Osen, D., & Ravera, E. (2012). On the use of  
712 ultracentrifugal devices for sedimented solute NMR. *J Biomol NMR*, 54(2), 123-127.  
713 <https://doi.org/10.1007/s10858-012-9657-y>
- 714
- 715 Clantin, B., Delattre, A. S., Rucktooa, P., Saint, N., Meli, A. C., Locht, C., Jacob-Dubuisson, F., & Villeret, V.  
716 (2007). Structure of the membrane protein FhaC: a member of the Omp85-TpsB transporter  
717 superfamily. *Science*, 317(5840), 957-961. <https://doi.org/10.1126/science.1143860>
- 718
- 719 Dé, E., Saint, N., Glinel, K., Méli, A. C., Levy, D., & Jacob-Dubuisson, F. (2008). Influence of the passenger  
720 domain of a model autotransporter on the properties of its translocator domain. *Mol Membr Biol*,  
721 25(3), 192-202. <https://doi.org/10.1080/09687680701771925>
- 722
- 723 Delaglio, F., Grzesiek, S., Vuister, G. W., Zhu, G., Pfeifer, J., & Bax, A. (1995). NMRPipe: a multidimensional  
724 spectral processing system based on UNIX pipes. *J Biomol NMR*, 6(3), 277-293.  
725 <https://doi.org/10.1007/BF00197809>
- 726
- 727 Delattre, A. S., Saint, N., Clantin, B., Willery, E., Lippens, G., Locht, C., Villeret, V., & Jacob-Dubuisson, F.  
728 (2011). Substrate recognition by the POTRA domains of TpsB transporter FhaC. *Mol Microbiol*,  
729 81(1), 99-112. <https://doi.org/10.1111/j.1365-2958.2011.07680.x>
- 730
- 731 Derbise, A., Lesic, B., Dacheux, D., Ghigo, J.-M., & Carniel, E. (2003). A rapid and simple method for  
732 inactivating chromosomal genes in *Yersinia*. *FEMS Immunol Med Microbiol*, 38, 113-116.  
733 [https://doi.org/10.1016/S0928-8244\(03\)00181-0](https://doi.org/10.1016/S0928-8244(03)00181-0)
- 734
- 735 Diederichs, K. A., Ni, X., Rollauer, S. E., Botos, I., Tan, X., King, M. S., Kunji, E. R. S., Jiang, J., & Buchanan, S.  
736 K. (2020). Structural insight into mitochondrial beta-barrel outer membrane protein biogenesis.  
737 *Nat Commun*, 11(1), 3290. <https://doi.org/10.1038/s41467-020-17144-1>
- 738
- 739 Doerner, P. A., & Sousa, M. C. (2017). Extreme Dynamics in the BamA beta-Barrel Seam. *Biochemistry*,  
740 56(24), 3142-3149. <https://doi.org/10.1021/acs.biochem.7b00281>
- 741
- 742 Doyle, M. T., & Bernstein, H. D. (2019). Bacterial outer membrane proteins assemble via asymmetric  
743 interactions with the BamA beta-barrel. *Nat Commun*, 10(1), 3358.  
744 <https://doi.org/10.1038/s41467-019-11230-9>
- 745
- 746 Estrada Mallarino, L., Fan, E., Odermatt, M., Muller, M., Lin, M., Liang, J., Heinzlmann, M., Fritsche, F.,  
747 Apell, H. J., & Welte, W. (2015). TtOmp85, a beta-barrel assembly protein, functions by barrel  
748 augmentation. *Biochemistry*, 54(3), 844-852. <https://doi.org/10.1021/bi5011305>
- 749
- 750 Fan, E., Fiedler, S., Jacob-Dubuisson, F., & Muller, M. (2012). Two-partner secretion of gram-negative  
751 bacteria: a single beta-barrel protein enables transport across the outer membrane. *J Biol Chem*,  
752 287(4), 2591-2599. <https://doi.org/10.1074/jbc.M111.293068>

- 753  
754 Garcia-Rubio, I. (2020). EPR of site-directed spin-labeled proteins: A powerful tool to study structural  
755 flexibility. *Arch Biochem Biophys*, 684, 108323. <https://doi.org/10.1016/j.abb.2020.108323>
- 756  
757 Gu, Y., Li, H., Dong, H., Zeng, Y., Zhang, Z., Paterson, N. G., Stansfeld, P. J., Wang, Z., Zhang, Y., Wang, W.,  
758 & Dong, C. (2016). Structural basis of outer membrane protein insertion by the BAM complex.  
759 *Nature*, 531(7592), 64-69. <https://doi.org/10.1038/nature17199>
- 760  
761 Guedin, S., Willery, E., Locht, C., & Jacob-Dubuisson, F. (1998). Evidence that a globular conformation is  
762 not compatible with FhaC-mediated secretion of the *Bordetella pertussis* filamentous  
763 haemagglutinin. *Mol Microbiol*, 29(3), 763-774. <https://doi.org/10.1046/j.1365-2958.1998.00970.x>
- 764  
765  
766 Guedin, S., Willery, E., Tommassen, J., Fort, E., Drobecq, H., Locht, C., & Jacob-Dubuisson, F. (2000). Novel  
767 topological features of FhaC, the outer membrane transporter involved in the secretion of the  
768 *Bordetella pertussis* filamentous hemagglutinin. *J Biol Chem*, 275(39), 30202-30210.  
769 <https://doi.org/10.1074/jbc.M005515200>
- 770  
771 Guerin, J., Baud, C., Touati, N., Saint, N., Willery, E., Locht, C., Vezin, H., & Jacob-Dubuisson, F. (2014).  
772 Conformational dynamics of protein transporter FhaC: large-scale motions of plug helix. *Mol*  
773 *Microbiol*, 92(6), 1164-1176. <https://doi.org/10.1111/mmi.12585>
- 774  
775 Guerin, J., Bigot, S., Schneider, R., Buchanan, S. K., & Jacob-Dubuisson, F. (2017). Two-partner secretion:  
776 Combining efficiency and simplicity in the secretion of large proteins for bacteria-host and  
777 bacteria-bacteria interactions. *Front Cell Infect Microbiol*, 7, 148.  
778 <https://doi.org/10.3389/fcimb.2017.00148>
- 779  
780 Guerin, J., Botos, I., Zhang, Z., Lundquist, K., Gumbart, J. C., & Buchanan, S. K. (2020). Structural insight  
781 into toxin secretion by contact-dependent growth inhibition transporters. *Elife*, 9.  
782 <https://doi.org/10.7554/eLife.58100>
- 783  
784 Guerin, J., Saint, N., Baud, C., Meli, A. C., Etienne, E., Locht, C., Vezin, H., & Jacob-Dubuisson, F. (2015).  
785 Dynamic interplay of membrane-proximal POTRA domain and conserved loop L6 in Omp85  
786 transporter FhaC. *Mol Microbiol*, 98(3), 490-501. <https://doi.org/10.1111/mmi.13137>
- 787  
788 Hagelueken, G., Abdullin, D., & Schiemann, O. (2015). mtsslSuite: Probing biomolecular conformation by  
789 spin-labeling studies. *Methods Enzymol*, 563, 595-622.  
790 <https://doi.org/10.1016/bs.mie.2015.06.006>
- 791  
792 Hartmann, J. B., Zahn, M., Burmann, I. M., Bibow, S., & Hiller, S. (2018). Sequence-specific solution NMR  
793 assignments of the beta-barrel insertase BamA to monitor its conformational ensemble at the  
794 atomic level. *J Am Chem Soc*, 140(36), 11252-11260. <https://doi.org/10.1021/jacs.8b03220>



- 795  
796 Heinz, E., & Lithgow, T. (2014). A comprehensive analysis of the Omp85/TpsB protein superfamily  
797 structural diversity, taxonomic occurrence, and evolution. *Front Microbiol*, 5, 370.  
798 <https://doi.org/10.3389/fmicb.2014.00370>
- 799  
800 Höhr, A. I. C., Lindau, C., Wirth, C., Qiu, J., Stroud, D. A., Kutik, S., Guiard, B., Hunte, C., Becker, T., Pfanner,  
801 N., & Wiedemann, N. (2018). Membrane protein insertion through a mitochondrial beta-barrel  
802 gate. *Science*, 359(6373). <https://doi.org/10.1126/science.aah6834>
- 803  
804 Iadanza, M. G., Higgins, A. J., Schiffrin, B., Calabrese, A. N., Brockwell, D. J., Ashcroft, A. E., Radford, S. E.,  
805 & Ranson, N. A. (2016). Lateral opening in the intact beta-barrel assembly machinery captured by  
806 cryo-EM. *Nat Commun*, 7, 12865. <https://doi.org/10.1038/ncomms12865>
- 807  
808 Iadanza, M. G., Schiffrin, B., White, P., Watson, M. A., Horne, J. E., Higgins, A. J., Calabrese, A. N., Brockwell,  
809 D. J., Tuma, R., Kalli, A. C., Radford, S. E., & Ranson, N. A. (2020). Distortion of the bilayer and  
810 dynamics of the BAM complex in lipid nanodiscs. *Commun Biol*, 3(1), 766.  
811 <https://doi.org/10.1038/s42003-020-01419-w>
- 812  
813 Iwahara, J., Tang, C., & Marius Clore, G. (2007). Practical aspects of (1)H transverse paramagnetic  
814 relaxation enhancement measurements on macromolecules. *J Magn Reson*, 184(2), 185-195.  
815 <https://doi.org/10.1016/j.jmr.2006.10.003>
- 816  
817 Jeschke, G. (2012). DEER distance measurements on proteins. *Annu Rev Phys Chem*, 63, 419-446.  
818 <https://doi.org/10.1146/annurev-physchem-032511-143716>
- 819  
820 Jeschke, G. (2013). Conformational dynamics and distribution of nitroxide spin labels. *Prog Nucl Magn*  
821 *Reson Spectrosc*, 72, 42-60. <https://doi.org/10.1016/j.pnmrs.2013.03.001>
- 822  
823 Jeschke, G. (2020). MMM: Integrative ensemble modeling and ensemble analysis. *Protein Sci*.  
824 <https://doi.org/10.1002/pro.3965>
- 825  
826 Jeschke, G., Chechik, V., Ionita, P., Godt, A., Zimmermann, H., Banham, J., Timmel, C. R., Hilger, D., & Jung,  
827 H. (2006). DeerAnalysis – a comprehensive software package for analyzing pulsed ELDOR data  
828 2006, 30, 473-498. *Appl Magnetic Reson*, 30, 473-498.
- 829  
830 Knowles, T. J., Scott-Tucker, A., Overduin, M., & Henderson, I. R. (2009). Membrane protein architects:  
831 the role of the BAM complex in outer membrane protein assembly. *Nat Rev Microbiol*, 7(3), 206-  
832 214. <https://doi.org/10.1038/nrmicro2069>
- 833  
834 Kurauskas, V., Weber, E., Hessel, A., Ayala, I., Marion, D., & Schanda, P. (2016). Cross-correlated relaxation  
835 of dipolar coupling and chemical-shift anisotropy in magic-angle spinning R1rho NMR

- 836 measurements: Application to protein backbone dynamics measurements. *J Phys Chem B*, 120(34),  
837 8905-8913. <https://doi.org/10.1021/acs.jpcc.6b06129>
- 838
- 839 Landreh, M., Marty, M., Gault, J., & Robinson, C. (2016). A sliding selectivity scale for lipid binding to  
840 membrane proteins. *Curr Op Struct Biol*, 39, 54-60. <https://doi.org/10.1016/j.sbi.2016.04.005>
- 841
- 842 Lee, W., Tonelli, M., & Markley, J. L. (2015). NMRFAM-SPARKY: enhanced software for biomolecular NMR  
843 spectroscopy. *Bioinformatics*, 31(8), 1325-1327. <https://doi.org/10.1093/bioinformatics/btu830>
- 844
- 845 Lewandowski, J. R., Sass, H. J., Grzesiek, S., Blackledge, M., & Emsley, L. (2011). Site-specific measurement  
846 of slow motions in proteins. *J Am Chem Soc*, 133(42), 16762-16765.  
847 <https://doi.org/10.1021/ja206815h>
- 848
- 849 Liang, B., & Tamm, L. K. (2016). NMR as a tool to investigate the structure, dynamics and function of  
850 membrane proteins. *Nat Struct Mol Biol*, 23(6), 468-474. <https://doi.org/10.1038/nsmb.3226>
- 851
- 852 Ma, P., Haller, J. D., Zajakala, J., Macek, P., Sivertsen, A. C., Willbold, D., Boisbouvier, J., & Schanda, P.  
853 (2014). Probing transient conformational states of proteins by solid-state R(1rho) relaxation-  
854 dispersion NMR spectroscopy. *Angew Chem Int Ed Engl*, 53(17), 4312-4317.  
855 <https://doi.org/10.1002/anie.201311275>
- 856
- 857 Maier, T., Clantin, B., Gruss, F., Dewitte, F., Delattre, A. S., Jacob-Dubuisson, F., Hiller, S., & Villeret, V.  
858 (2015). Conserved Omp85 lid-lock structure and substrate recognition in FhaC. *Nat Commun*, 6,  
859 7452. <https://doi.org/10.1038/ncomms8452>
- 860
- 861 Méli, A. C., Hodak, H., Clantin, B., Locht, C., Molle, G., Jacob-Dubuisson, F., & Saint, N. (2006). Channel  
862 properties of TpsB transporter FhaC point to two functional domains with a C-terminal protein-  
863 conducting pore. *J Biol Chem*, 281, 158-166. <https://doi.org/10.1074/jbc.M508524200>
- 864
- 865 Mittermaier, A. K., & Kay, L. E. (2009). Observing biological dynamics at atomic resolution using NMR.  
866 *Trends Biochem Sci*, 34(12), 601-611. <https://doi.org/10.1016/j.tibs.2009.07.004>
- 867
- 868 Nadaud, P. S., Helmus, J. J., Hofer, N., & Jaroniec, C. P. (2007). Long-range structural restraints in spin-  
869 labeled proteins probed by solid-state nuclear magnetic resonance spectroscopy. *J Am Chem Soc*,  
870 129(24), 7502-7503. <https://doi.org/10.1021/ja072349t>
- 871
- 872 Noinaj, N., Gumbart, J. C., & Buchanan, S. K. (2017). The beta-barrel assembly machinery in motion. *Nat*  
873 *Rev Microbiol*, 15(4), 197-204. <https://doi.org/10.1038/nrmicro.2016.191>
- 874

- 875 Noinaj, N., Kuszak, A. J., Balusek, C., Gumbart, J. C., & Buchanan, S. K. (2014). Lateral opening and exit pore  
876 formation are required for BamA function. *Structure*, 22(7), 1055-1062.  
877 <https://doi.org/10.1016/j.str.2014.05.008>
- 878  
879 Noinaj, N., Kuszak, A. J., Gumbart, J. C., Lukacik, P., Chang, H., Easley, N. C., Lithgow, T., & Buchanan, S. K.  
880 (2013). Structural insight into the biogenesis of beta-barrel membrane proteins. *Nature*,  
881 501(7467), 385-390. <https://doi.org/10.1038/nature12521>
- 882  
883 Organesyan, V. S., Chami, F., White, G. F., & Thomson, A. J. (2017). A combined EPR and MD simulation  
884 study of a nitroxyl spin label with restricted internal mobility sensitive to protein dynamics. *J*  
885 *Magnetic Resonance*, 274, 24-35.
- 886  
887 Palmer, A. G., 3rd, & Massi, F. (2006). Characterization of the dynamics of biomacromolecules using  
888 rotating-frame spin relaxation NMR spectroscopy. *Chem Rev*, 106(5), 1700-1719.  
889 <https://doi.org/10.1021/cr0404287>
- 890  
891 Pannier, M., Veit, S., Godt, A., Jeschke, G., & Spiess, H. W. (2000). Dead-time free measurement of dipole-  
892 dipole interactions between electron spins. *J Magnetic Reson* 142, 331-340.
- 893  
894 Renault, M., Bos, M. P., Tommassen, J., & Baldus, M. (2011). Solid-state NMR on a large multidomain  
895 integral membrane protein: the outer membrane protein assembly factor BamA. *J Am Chem Soc*,  
896 133(12), 4175-4177. <https://doi.org/10.1021/ja109469c>
- 897  
898 Ritchie, T. K., Grinkova, Y. V., Bayburt, T. H., Denisov, I. G., Zolnerciks, J. K., Atkins, W. M., & Sligar, S. G.  
899 (2009). Reconstitution of membrane proteins in phospholipid bilayer nanodiscs. *Methods Enzymol*,  
900 464, 211-231. [https://doi.org/10.1016/S0076-6879\(09\)64011-8](https://doi.org/10.1016/S0076-6879(09)64011-8)
- 901  
902 Ruschak, A. M., & Kay, L. E. (2010). Methyl groups as probes of supra-molecular structure, dynamics and  
903 function. *J Biomol NMR*, 46(1), 75-87. <https://doi.org/10.1007/s10858-009-9376-1>
- 904  
905 Sahu, I. D., & Lorigan, G. A. (2020). Electron paramagnetic resonance as a tool for studying membrane  
906 proteins. *Biomolecules*, 10(5). <https://doi.org/10.3390/biom10050763>
- 907  
908 Schanda, P., & Brutscher, B. (2005). Very fast two-dimensional NMR spectroscopy for real-time  
909 investigation of dynamic events in proteins on the time scale of seconds. *J Am Chem Soc*, 127(22),  
910 8014-8015. <https://doi.org/10.1021/ja051306e>
- 911  
912 Tian, Y., Han, L., Buckner, A. C., & Ruotolo, B. T. (2015). Collision induced unfolding of intact antibodies:  
913 Rapid characterization of disulfide bonding patterns, glycosylation, and structures. *Anal Chem*,  
914 87(22), 11509-11515. <https://doi.org/10.1021/acs.analchem.5b03291>
- 915

- 916 Tomasek, D., Rawson, S., Lee, J., Wzorek, J. S., Harrison, S. C., Li, Z., & Kahne, D. (2020). Structure of a  
917 nascent membrane protein as it folds on the BAM complex. *Nature*, 583(7816), 473-478.  
918 <https://doi.org/10.1038/s41586-020-2370-1>
- 919
- 920 Torricella, F., Pierro, A., Mileo, E., Belle, V., & Bonucci, A. (2021). Nitroxide spin labels and EPR  
921 spectroscopy: A powerful association for protein dynamics studies. *Biochim Biophys Acta Proteins  
922 Proteom*, 1869(7), 140653. <https://doi.org/10.1016/j.bbapap.2021.140653>
- 923
- 924 Venditti, V., Fawzi, N. L., & Clore, G. M. (2011). Automated sequence- and stereo-specific assignment of  
925 methyl-labeled proteins by paramagnetic relaxation and methyl-methyl nuclear Overhauser  
926 enhancement spectroscopy. *J Biomol NMR*, 51(3), 319-328. [https://doi.org/10.1007/s10858-011-  
927 9559-4](https://doi.org/10.1007/s10858-011-9559-4)
- 928
- 929 Vranken, W. F., Boucher, W., Stevens, T. J., Fogh, R. H., Pajon, A., Llinas, M., Ulrich, E. L., Markley, J. L.,  
930 Ionides, J., & Laue, E. D. (2005). The CCPN data model for NMR spectroscopy: development of a  
931 software pipeline. *Proteins*, 59(4), 687-696. <https://doi.org/10.1002/prot.20449>
- 932
- 933 Warner, L. R., Gatzeva-Topalova, P. Z., Doerner, P. A., Pardi, A., & Sousa, M. C. (2017). Flexibility in the  
934 periplasmic domain of BamA is important for function. *Structure*, 25(1), 94-106.  
935 <https://doi.org/10.1016/j.str.2016.11.013>
- 936
- 937 Xiao, L., Han, L., Li, B., Zhang, M., Zhou, H., Luo, Q., Zhang, X., & Huang, Y. (2021). Structures of the beta-  
938 barrel assembly machine recognizing outer membrane protein substrates. *FASEB J*, 35(1), e21207.  
939 <https://doi.org/10.1096/fj.202001443RR>
- 940
- 941 Zhong, Y., Han, L., & Ruotolo, B. (2014). Collisional and coulombic unfolding of gas-phase proteins: High  
942 correlation to their domain structures in solution *Angew. Chem*, 53(35), 9209-9212.  
943 <https://doi.org/10.1002/anie.201403784>
- 944
- 945 Zhou, D. H., & Rienstra, C. M. (2008). High-performance solvent suppression for proton detected solid-  
946 state NMR. *J Magn Reson*, 192(1), 167-172. <https://doi.org/10.1016/j.jmr.2008.01.012>
- 947
- 948

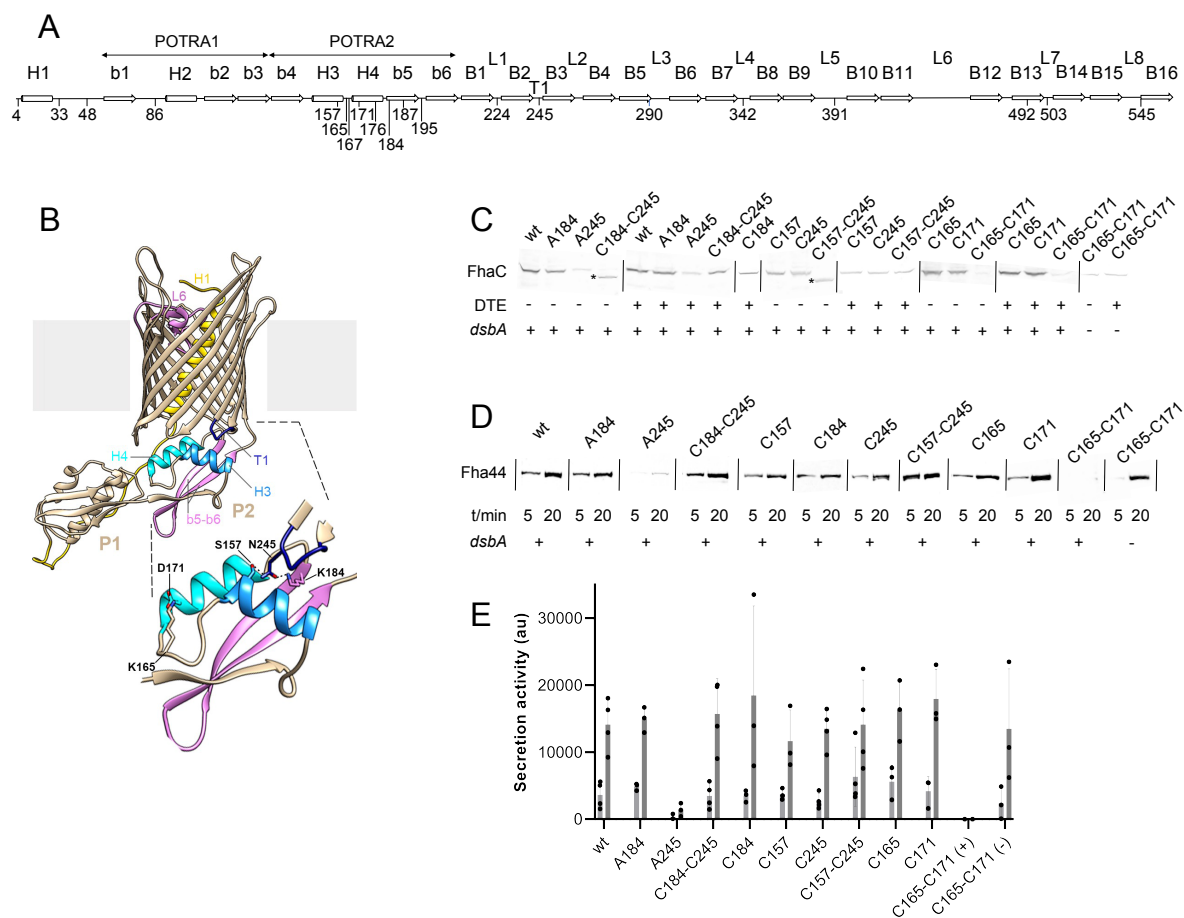

**Figure 1. Effects of engineered S-S bonds on FhaC activity.** (A) Linear representation of the secondary structure elements of FhaC, with residues used in this work. L1 to L8 represent the extracellular loops, b1 to b6 the  $\beta$  strands of the POTRA domains, H1 to H4 the  $\alpha$  helices, and B1 to B16 the  $\beta$ -barrel strands. T1 is the first periplasmic turn. (B) Structural model of FhaC (PDB 4QKY). A zoom of the POTRA2 domain is shown below. (C) Residues involved in a salt bridge (Lys<sup>165</sup>-Asp<sup>171</sup>) or H bonds (Lys<sup>184</sup>-Asn<sup>245</sup>; Ser<sup>157</sup>-Asn<sup>245</sup>) in the resting conformation of FhaC were replaced as indicated (C=Cys; A=Ala). Immunoblots were performed on membrane extracts with anti-FhaC antibodies. The asterisks indicate oxidized species of FhaC detected in the absence of the reducing agent dithioerythritol (DTE) in the sample buffer. (D) The secretion activity of the FhaC variants was determined using a model substrate, Fha44-His, affinity precipitated from supernatants 5 and 20 min after induction. Immunoblots were developed with an anti-6His tag monoclonal antibody. (E) Quantification of Fha44 found in culture supernatants after 5 and 20 min. The means and standard deviations of the means are shown (n=3 or 4). Activity of FhaC<sup>C165+C171</sup> could only be detected in the *dsbA* KO strain (denoted C165-C171(-)), not in its wild type parent (denoted C165-C171(+)).

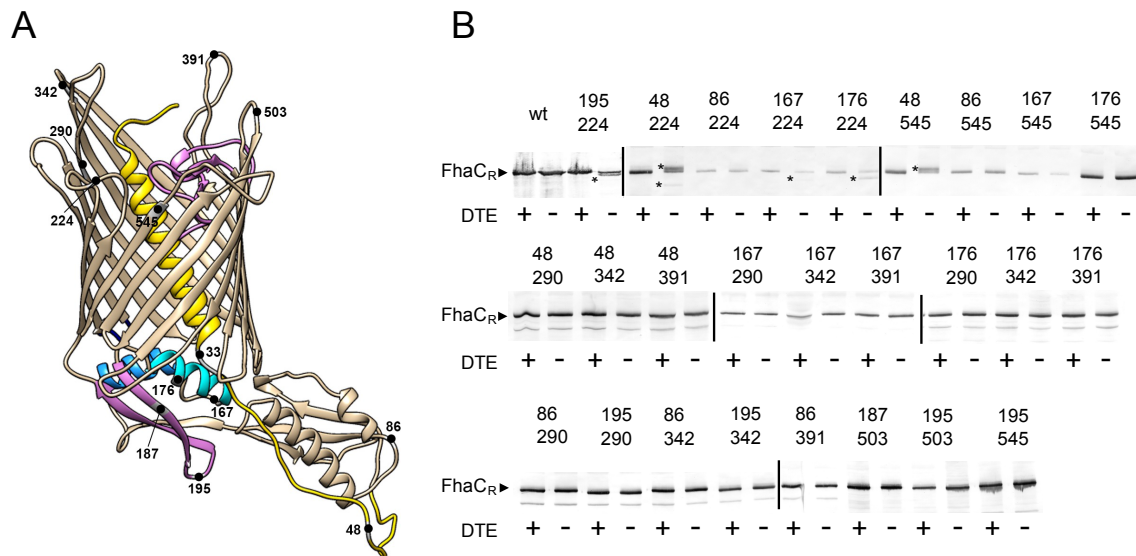

**Figure 2. Detection of transient conformers of FhaC *in vivo*.** (A) Position of the Cys substitutions in FhaC. (B) Immunoblot of membrane fractions of *E. coli* JCB571 (*dsbA* KO strain) producing FhaC variants. The numbers indicate the positions of the two Cys residues. The reducing agent DTE was added to one half of each sample. FhaC<sub>R</sub> represents the position of the reduced form. The asterisks point to the additional, cross-linked forms that can migrate faster or more slowly than the reduced form, depending on the respective positions of the two Cys residues. S-S bond formation was confirmed by mass fingerprinting analyses (Figure Supplement 1).

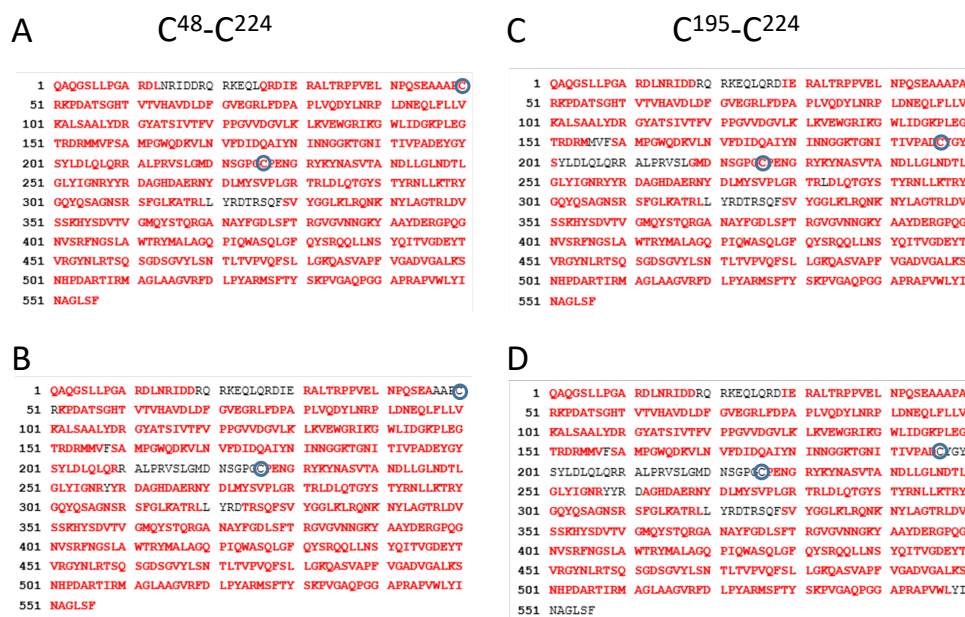

**Figure 2 Supplement 1. Peptide mapping analysis of FhaC<sup>C48-C224</sup> and FhaC<sup>C195-C224</sup>.** Residues in red represent sequence coverage with (A,C) or without (B,D) reduction and alkylation. In the latter cases, the regions that contain the Cys residues were not characterized, suggesting the presence of an intramolecular S-S bond in both variants. Note that the sequences shown here contain an N-proximal Gly-Ser insertion for cloning purposes that has no effect on the structure or the activity of FhaC. The numbering of FhaC throughout the text corresponds to that of the native protein without this insertion.

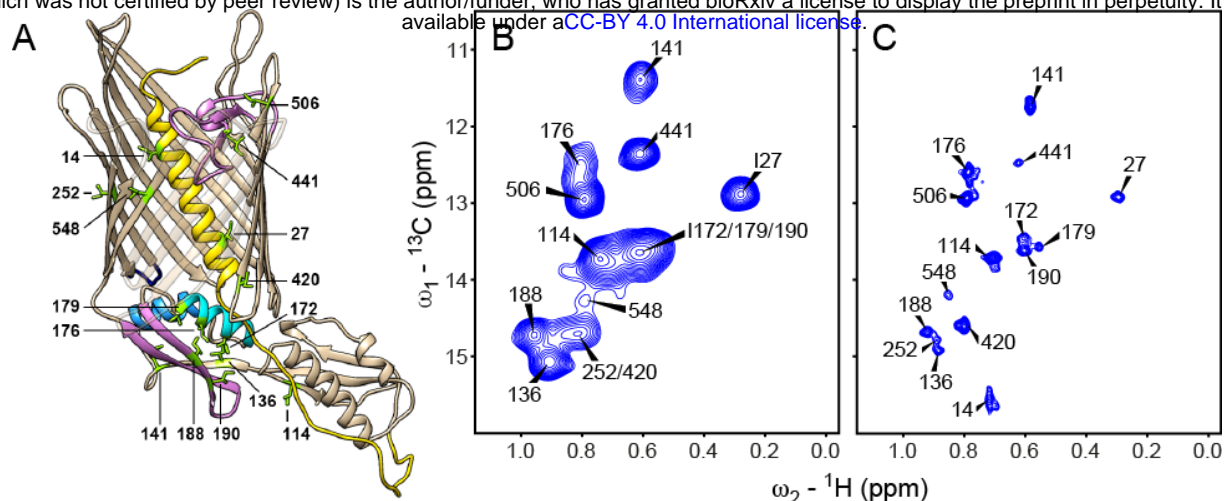

**Figure 3. NMR analysis of Ile  $\delta_1$  methyl labeled FhaC in lipid bilayers.** (A) Structure of FhaC with Ile residues labeled and drawn as green sticks. Color code of structural elements is as in Fig. 1.  $\beta$ -strands 1 to 4 are drawn transparently for visibility. (B) Methyl region of a solid-state dipolar hCH  $^{13}\text{C}$ - $^1\text{H}$  correlation spectrum of u- $(^2\text{H}, ^{15}\text{N})$ , Ile- $\delta_1(^{13}\text{CH}_3)$ -labeled wt FhaC in *E. coli* polar lipid liposomes, recorded at 50 kHz MAS on an 800 MHz spectrometer. (C) Same region as in (B) of a solution-state heteronuclear multiple quantum coherence (HMQC)  $^{13}\text{C}$ - $^1\text{H}$  correlation spectrum of FhaC $^{195\text{R}1}$  (same isotope labeling as in (B)) in  $^2\text{H}$ -MSP1D1 nanodiscs containing deuterated DMPC and DMPG lipids, recorded on a 900 MHz spectrometer. The MTSL tag (called R1, see below) on residue 195 was reduced with ascorbic acid; peak positions are identical to those of wt FhaC in nanodiscs. These analyses were complemented by analyses of through-space correlations (Supplement 1) and relaxation dispersion experiments (Supplement 2).

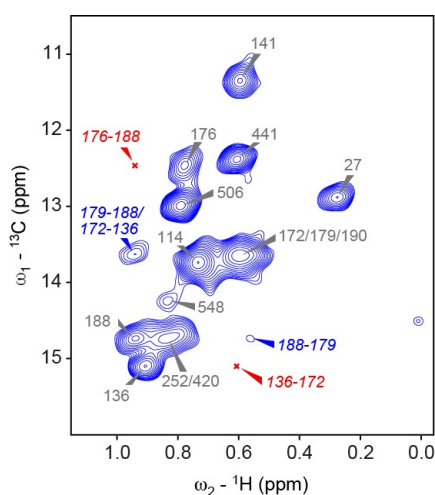

**Figure 3 Supplement 1. NMR analysis of through-space contacts between Ile  $\delta_1$  methyl groups in FhaC in liposomes.** 2D hChH correlation spectrum with 6.4 ms RFDR (Bennett et al., 1992)  $^1\text{H}$ - $^1\text{H}$  mixing of FhaC u- $(^2\text{H}, ^{15}\text{N})$ , Ile- $\delta_1(^{13}\text{CH}_3)$  in  $d_{54}$ -DMPC/ $d_{54}$ -DMPG liposomes, recorded on an 800 MHz NMR spectrometer, to visualize through-space correlations between Ile  $\delta_1$  methyl groups close in space. Among expected inter-residue cross-peaks ( $^1\text{H}$ - $^1\text{H}$  distance below 6 Å), peaks present in the spectrum are indicated in blue, those which are absent in red.



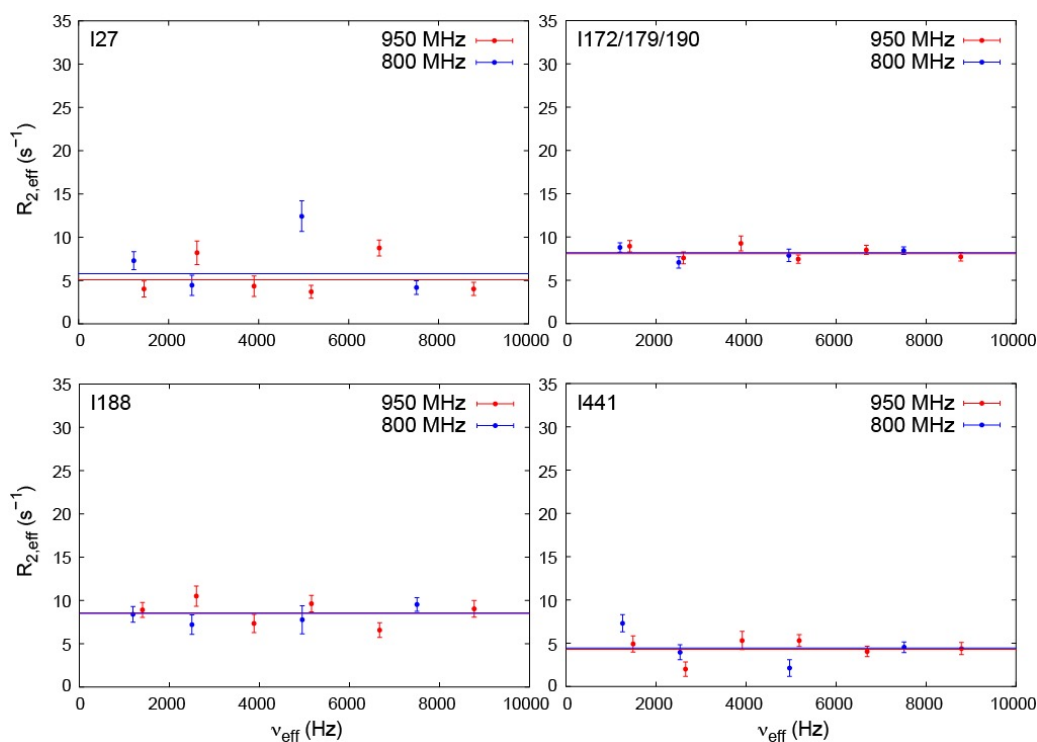

**Figure 3 Supplement 2. NMR relaxation dispersion experiments to measure  $\mu s$  time scale exchange dynamics in FhaC.** Effective  $^{13}C$  transverse relaxation rates  $R_{2,eff}$  extracted from solid-state NMR  $R_{1\rho}$  relaxation dispersion experiments (Lewandowski et al., 2011; Ma et al., 2014) on selected Ile- $\delta_1$  methyl groups of u- $(^2H, ^{15}N)$ , Ile- $\delta_1(^{13}CH_3)$ -labeled wt FhaC, recorded on 800 (blue) and 950 MHz (red) spectrometers at 50 kHz MAS frequency and 17°C sample temperature. Horizontal lines are best fits to the data using a model of no exchange (i.e. constant  $R_{2,eff}$  values for varying applied  $B_1$  radiofrequency fields and thus varying effective fields  $\nu_{eff}$ ). Models assuming exchange do not fit the data significantly better according to F test statistics or Akaike's information criterion (AIC) in any of the Ile- $\delta_1(^{13}CH_3)$  groups of FhaC. Notably, data from residue Ile $^{548}$  in strand  $\beta 16$ , at the barrel junction with strand  $\beta 1$ , could not be reliably analyzed due to low signal-to-noise.

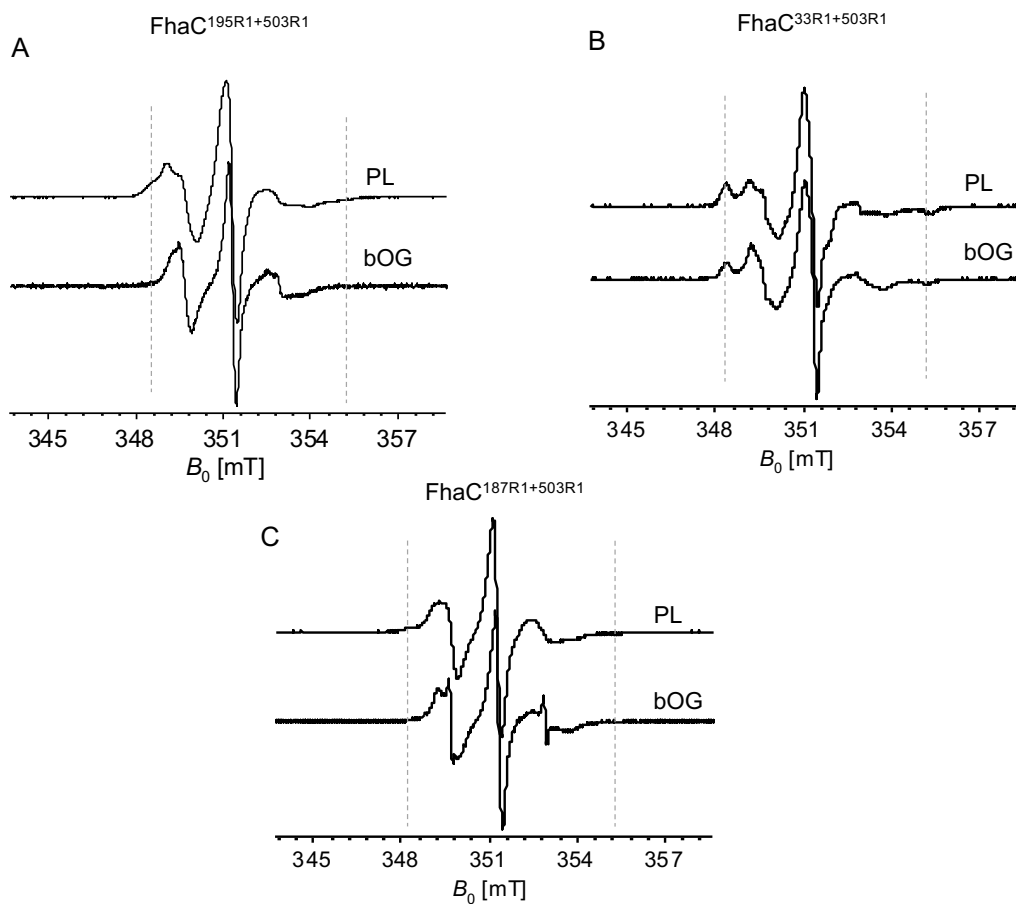

**Figure 4. CW-EPR analyses of FhaC variants.** (A) CW-EPR spectra of FhaC<sup>195R1+503R1</sup>, (B) FhaC<sup>33R1+503R1</sup> and (C) FhaC<sup>187R1+503R1</sup> in bOG micelles and proteoliposomes (PL) made of *E. coli* polar lipids, respectively. The line shapes of the spectra result from different components. The outer splitting varies from 7.0 to 3.0 mT, and an intermediate component with a broadening of 5.0 mT is also observed. The dotted lines indicate the highest value of  $A_{zz}$  (hyperfine coupling) for the nitroxide spin probe between the unpaired electron and the nitrogen nucleus. Spectra obtained in various other lipid environments are found in Supplement 1.

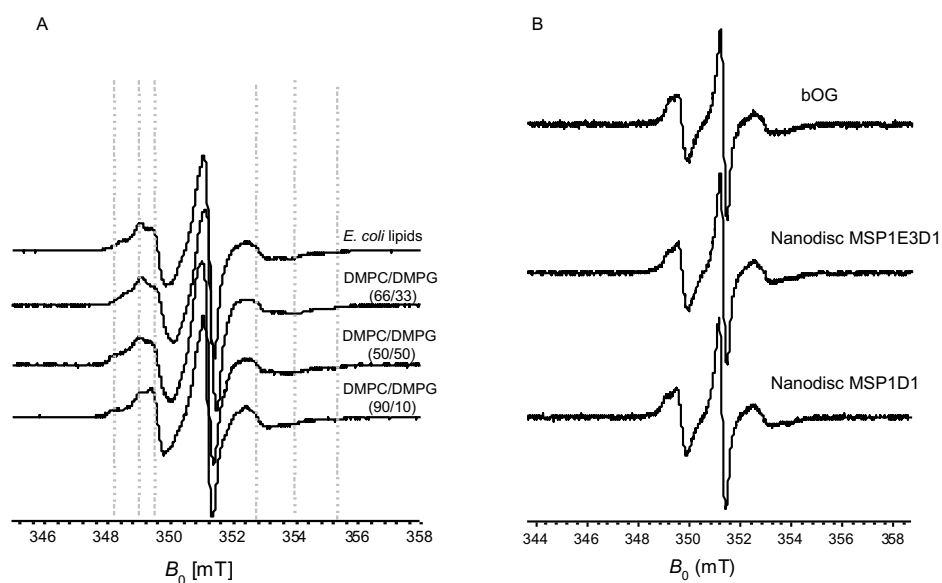

**Figure 4 Supplement 1. CW-EPR spectra of FhaC<sup>195R1+503R1</sup> in various environments.** (A) Proteoliposomes were made of DMPC and DMPG at different ratios, and the spectra obtained were compared with that of the same protein in proteoliposomes made of *E. coli* polar lipids. The dotted lines indicate the highest value of  $A_{zz}$  ( $\Delta B = 7$  mT) for the nitroxide spin probe between the unpaired electron and the nitrogen nucleus, as well as two additional components on the EPR spectra related to two species with different mobilities. At DMPC:DMPG ratios of 66:33 and 50:50, the spectra are very similar to that in *E. coli* polar lipids. (B) FhaC was inserted in nanodiscs of two different sizes, made with MSP1D1 or MSP1E3D1, and a 66:33 ratio of DMPC:DMPG.

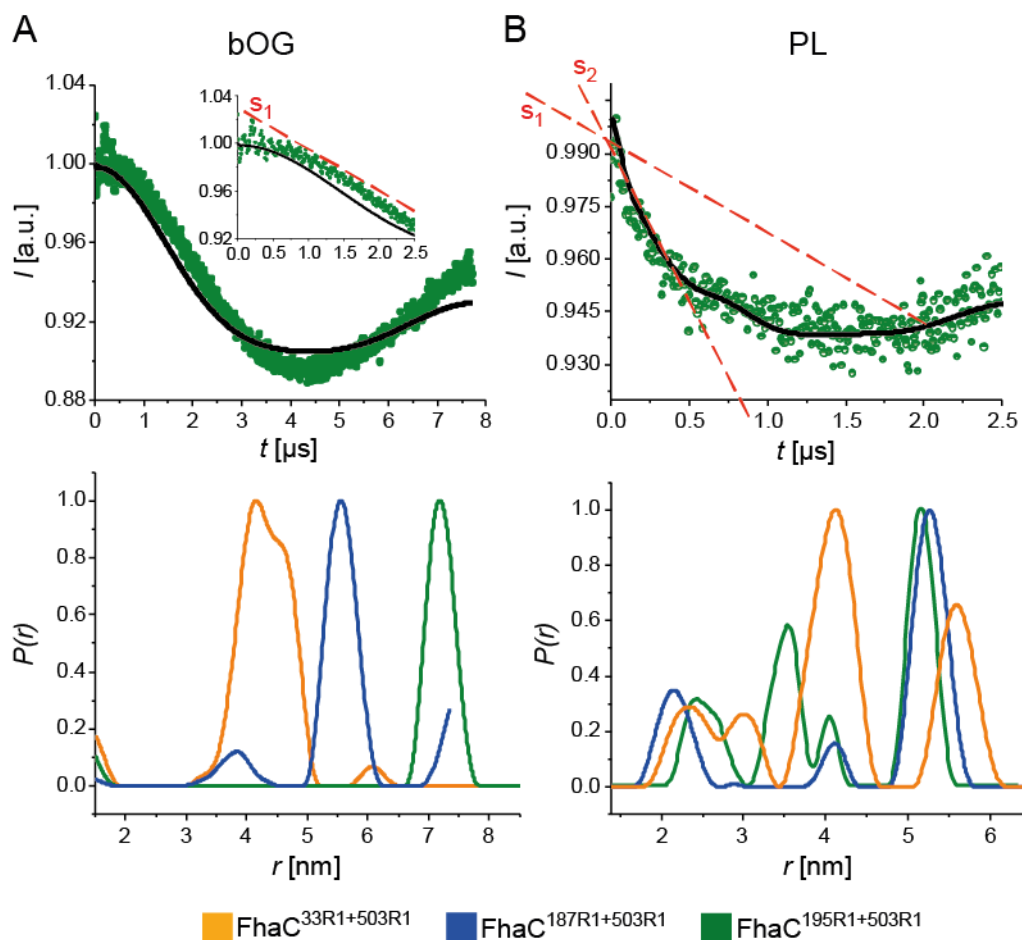

**Figure 5. PELDOR analyses of FhaC.** Dipolar evolution function for FhaC<sup>195R1+503R1</sup> (top), and distance distributions obtained by Tikhonov regularization of the dipolar evolution functions (bottom) for FhaC<sup>33R1+503R1</sup> (orange), FhaC<sup>187R1+503R1</sup> (blue), and FhaC<sup>195R1+503R1</sup> (green) in bOG (A) and in proteoliposomes (B) prepared with *E. coli* polar lipids (PL). The black lines in the upper panels correspond to the fitting of the experimental PELDOR traces. The inset in A represents the first 2.5  $\mu\text{s}$  of the dipolar evolution function for comparison with that shown in (B). The red dashed lines denoted S1 and S2 show the slopes of the first parts of the curves representing the dipolar evolution functions. Predicted distance distributions can be found in Supplement 1. Note that the longest distances measured depend on the dipolar evolution time  $t$ . As the lipid environment decreases the  $t$  that can be applied, the longest distances shift to smaller values for FhaC in proteoliposomes compared to bOG (Supplement 2). A mutation that severs the connection of the loop L6 to the inner barrel wall affects the EPR spectra of FhaC<sup>195R1+503R1</sup> (Supplement 3).

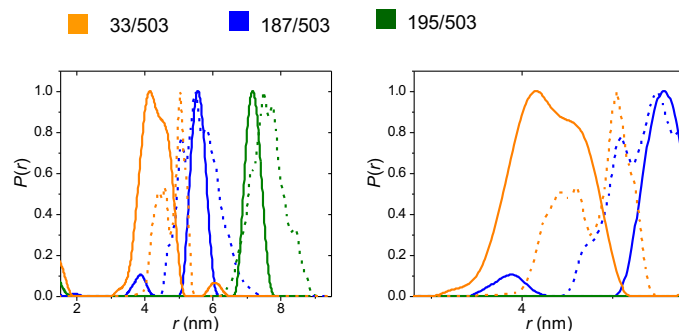

**Figure 5 Supplement 1. Distance distributions from PELDOR experiments.** The distance distributions obtained for FhaC<sup>33R1+503R1</sup> (orange), FhaC<sup>187R1+503R1</sup> (blue) and FhaC<sup>195R1+503R1</sup> (green) in bOG (solid lines) are compared with those predicted using a pre-computed rotamer library of the MTSL spin probe attached to specific residues on the PDB structure of FhaC (dashed lines) (Jeschke, 2020). In the right panel, a zoom on the 3-5 nm region shows the broad distribution for FhaC<sup>33R1+503R1</sup>.

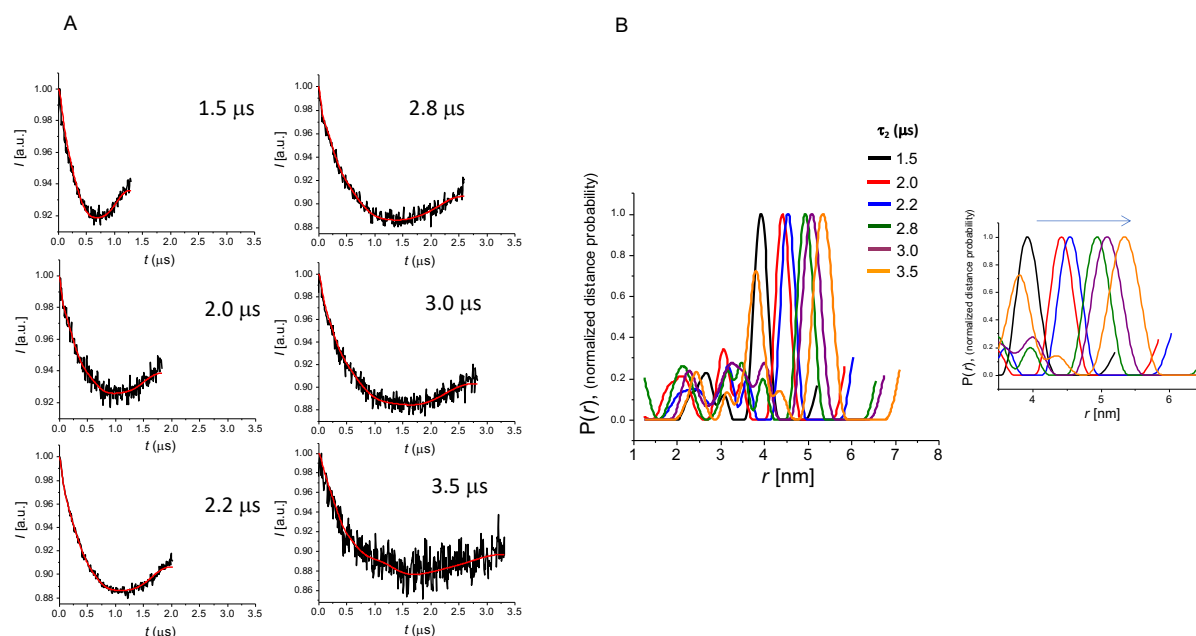

**Figure 5 Supplement 2. Dipolar evolution signals recorded with different delays  $\tau_2$  and corresponding distance distributions.** FhaC<sup>195R1+503R1</sup> in *E. coli* lipids liposomes was used in this experiment. (A) The dipolar evolution signals were measured at increasing dipolar evolution times  $t$ . (B) The longest distance measured shifts to longer values for longer dipolar evolution times  $t$  since long, but not short distances are sensitive to the value used in PELDOR experiments. The lipid environment decreases the dipolar evolution time that can be applied, which results in an apparent shift to smaller distance distribution values. The right panel is a zoom on the 4-6 nm region.

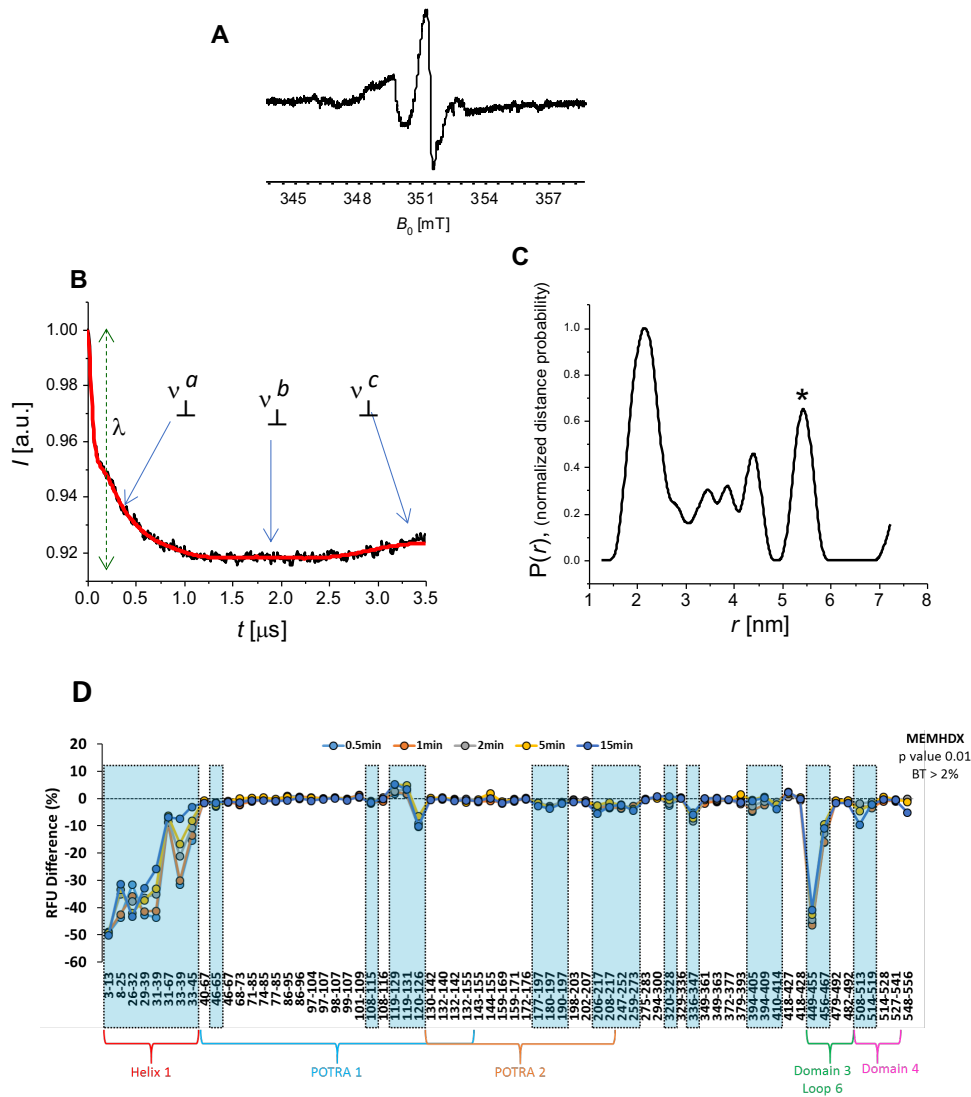

**Figure 5 Supplement 3. Effect of the L6-barrel interaction on conformational changes of FhaC.** (A) CW-EPR spectrum of FhaC<sup>R492+195R1+503R1</sup> in proteoliposomes. (B) Dipolar evolution function for the PELDOR signal. (C) Distance distribution obtained by Tikhonov regularization of the signal depicted in (B). The asterisk corresponds to the longest distance measurable as a function of the  $t$  parameter applicable in this experiment. (D) Results of hydrogen-deuterium exchange mass spectrometry. Comparison of relative fractional deuterium uptakes (RFU) between wt FhaC and the FhaC<sup>R492</sup> variant. Negative values correspond to less deuterium uptake by the wt protein relative to FhaC<sup>R492</sup>.

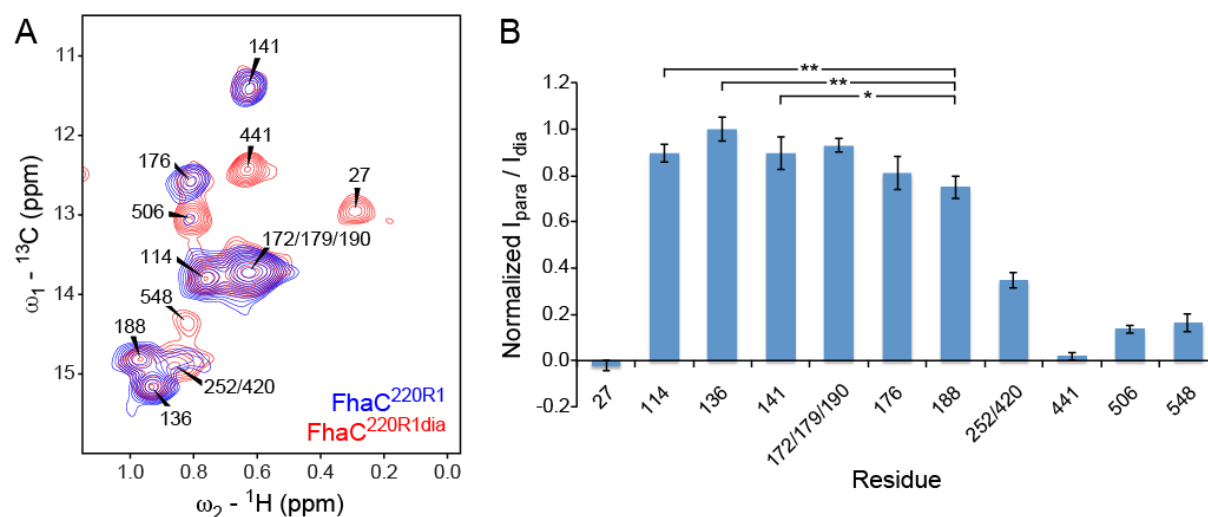

**Figure 6. NMR paramagnetic relaxation enhancement experiments (PRE) on FhaC.** (A) Superposition of dipolar solid-state hCH  ${}^{13}\text{C}$ - ${}^1\text{H}$  correlation spectra of u- $({}^2\text{H}, {}^{15}\text{N})$ , Ile- $\delta_1$ ( ${}^{13}\text{CH}_3$ )-labeled FhaC samples in *E. coli* polar lipid liposomes, with a paramagnetic MTSL tag (FhaC<sup>220R1</sup>, blue) or with a diamagnetic MTSL analog (FhaC<sup>220R1dia</sup>, red) attached to the introduced Cys<sup>220</sup> residue. Spectra were recorded at 800 MHz  ${}^1\text{H}$  Larmor frequency. (B) Ratios  $I_{\text{para}}/I_{\text{dia}}$  of Ile- $\delta_1$  methyl peak intensities in the hCH correlation spectra of FhaC<sup>220R1</sup> and FhaC<sup>220R1dia</sup> shown in (A), normalized to the maximum ratio observed in Ile<sup>136</sup>. Error bars are calculated based on spectral noise levels. \* and \*\* indicate significant ( $p < 0.05$  and  $p < 0.01$ , respectively) attenuation of the Ile<sup>188</sup> signal relative to the signals of the reference residues Ile<sup>114</sup>, Ile<sup>136</sup>, and Ile<sup>141</sup>. Distances between the probe and the Ile residues are shown in Supplement Table 1. PRE experiments in nanodiscs (Supplement 2) complement these analyses.

| Ile residue | Avg. dist. to paramag. center (Å) |
|-------------|-----------------------------------|
| 14          | 7.1                               |
| 252         | 11.7                              |
| 548         | 16.5                              |
| 27          | 17.5                              |
| 441         | 18.6                              |
| 506         | 25.3                              |
| 420         | 32.0                              |
| 179         | 32.1                              |
| 176         | 34.1                              |
| 188         | 35.4                              |
| 141         | 38.4                              |
| 172         | 40.4                              |
| 136         | 42.0                              |
| 190         | 43.5                              |
| 114         | 56.6                              |

**Figure 6 Supplement Table S1. Estimated Ile C $\delta_1$  – MTSL distances in the crystal structure conformation of FhaC<sup>220R1</sup>.** Shown are distances (in Å) between Ile C $\delta_1$  nuclei and the estimated average position of the paramagnetic center in FhaC with a MTSL spin label on residue 220 (FhaC<sup>220R1</sup>). An ensemble of 200 MTSL conformations compatible with labeling on FhaC residue 220 was calculated using the mtsslSuite web server (Hagelueken et al., 2012; Hagelueken et al., 2015) (<http://www.mtssluite.isb.ukbonn.de/>) and the FhaC crystal structure (PDB 4QKY). The average position of the paramagnetic center (taken as halfway between nitrogen and oxygen atoms of the MTSL nitroxide ring) was calculated from the coordinates of these 200 conformations; distances from that position to Ile C $\delta_1$  nuclei were calculated using PyMOL (The PyMOL Molecular Graphics System. Schrödinger, LLC). A horizontal line in the table indicates the distance from the paramagnetic center up to which attenuation effects on the NMR resonance of the corresponding Ile residue are expected if FhaC assumes a conformation as in the crystal structure.



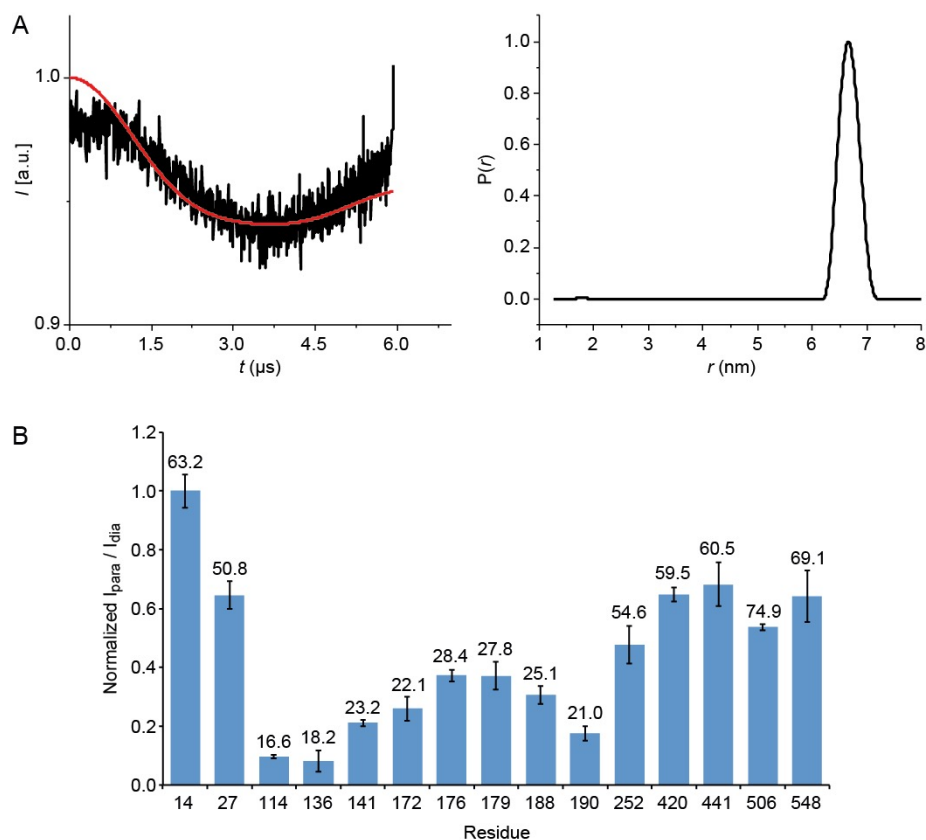

**Figure 6 Supplement 2. Spectroscopic analyses of FhaC in nanodiscs.** (A) Dipolar evolution function (*left*) and Tikhonov regularization (*right*) of the PELDOR signal of FhaC<sup>195R1+503R1</sup> in nanodiscs. (B) NMR paramagnetic relaxation enhancement experiments on FhaC<sup>195R1</sup> in nanodiscs. Ratios  $I_{para}/I_{dia}$  of paramagnetic vs. diamagnetic FhaC<sup>195R1</sup> Ile- $\delta_1$  methyl peak intensities (normalized to their maximum value found for Ile<sup>14</sup>) extracted from <sup>13</sup>C-<sup>1</sup>H heteronuclear multiple-quantum coherence (HMQC) experiments in solution before and after reduction of the MTSL spin label by addition of a 10-fold molar excess of ascorbic acid. Spectra were recorded on a 900 MHz spectrometer. Error bars are calculated based on spectral noise levels. Numbers above the bars indicate the distance between the C $\delta_1$  nucleus of the corresponding Ile residue and the average position of the paramagnetic center in an ensemble of conformations of the MTSL tag attached to Cys<sup>195</sup> in the FhaC crystal structure, calculated using the MtsslWizard PyMOL plugin (Hagelueken et al., 2012). Relative levels of signal attenuation due to the MTSL tag are perfectly in line with the relative distances of the corresponding residues from the paramagnetic center modeled onto the FhaC crystal structure, suggesting that FhaC in nanodiscs does not populate alternative conformations.

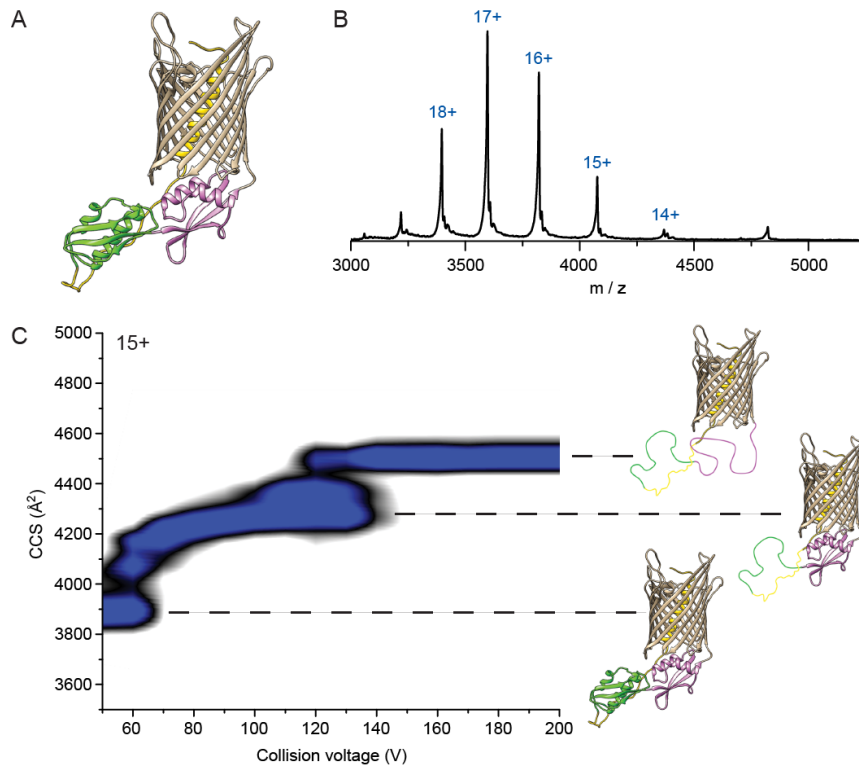

**Figure 7. Native mass spectrometry analysis of WT FhaC.** (A) Model of FhaC with H1 and the linker in yellow, and the POTRA domains 1 and 2 in pink and green, respectively. (B) Mass spectrum of WT FhaC released from its bOG micelle. The spectra at increasing collision energy are shown in Supplement 1. (C) Collision-induced unfolding (CIU) experiments show two dominant transitions that are likely linked to unfolding of the POTRA domains (see text), although the order in which they unfold is unknown. CIU profiles of control  $\beta$ -barrel proteins are shown in Supplement 2, and profiles of the FhaC<sup>C4+C391</sup> variant with H1 locked in the barrel are in Supplement 3.

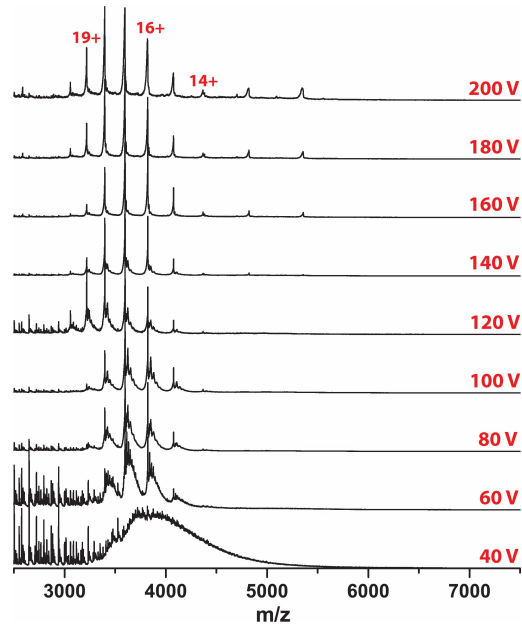

**Figure 7 Supplement 1. Native MS analysis of FhaC in bOG micelles.** The spectra were obtained at increasing collisional energy.

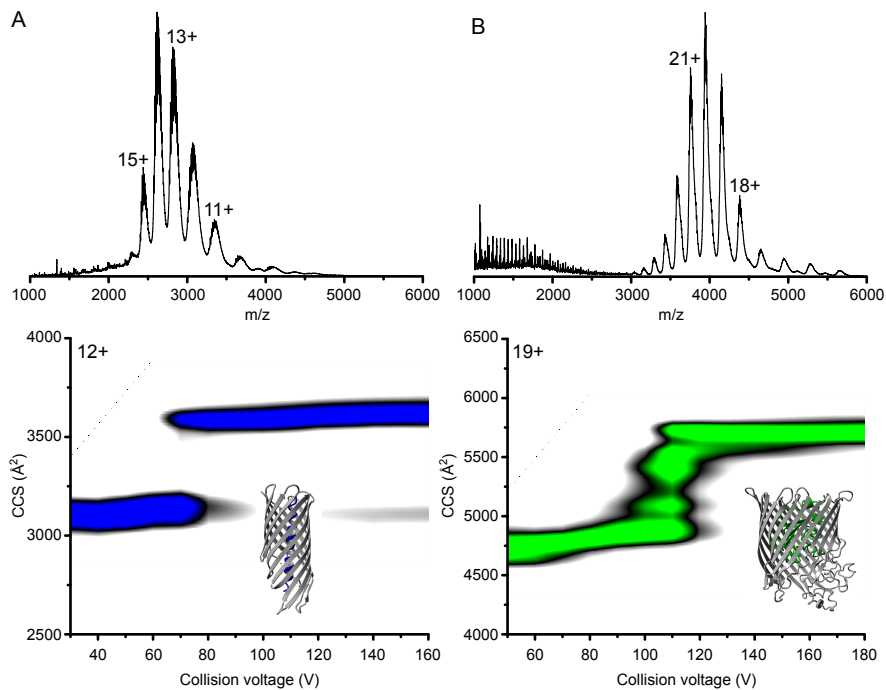

**Figure 7 Supplement 2. Mass spectra and CIU plots of control OMPs.** (A) SphB1- $\alpha\beta$  is a truncated autotransporter (AT) containing only the  $\beta$  barrel with the preceding helical linker inserted in the barrel pore. (B) The TonB-dependent transporter BfrG is composed of a  $\beta$  barrel with a soluble N-terminal plug domain inserted in the barrel. The structural models shown are those of related transporters (PDB 1UYN and 3QLB, respectively), as the structures of SphB1- $\alpha\beta$  and BfrG are not available. The mass spectra of the two OMPs released from their bOG micelles are shown at the top, and the CIU plots are below. Both show a single CIU transition, which suggests that the  $\beta$  barrels remain intact, while the soluble domains are ejected and unfold.

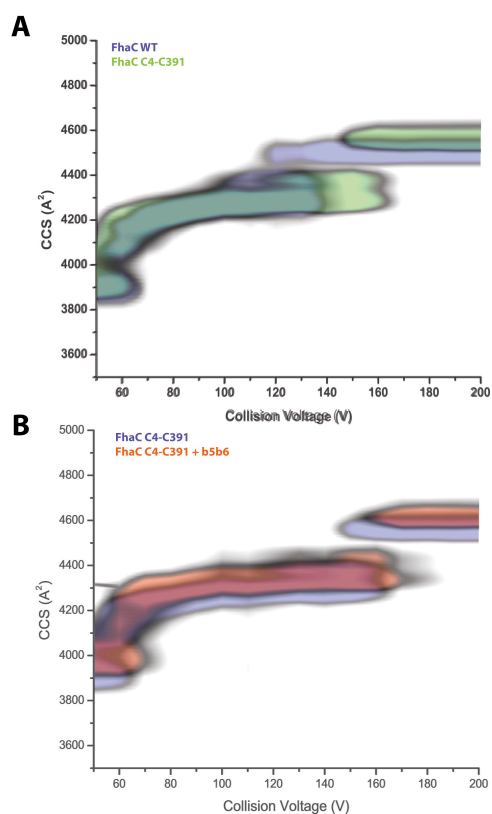

**Figure 7 Supplement 3. CIU plots of FhaC<sup>C4+C391</sup>.** (A) Comparison of the CIU plots of wt FhaC (blue) and the FhaC<sup>C4+C391</sup> variant (green). (B) Overlay of the CIU plots of unbound FhaC<sup>C4+C391</sup> (blue) and FhaC<sup>C4+C391</sup> with the b5-b6 peptide bound (red). As for wt FhaC (see Figure 8), binding of the peptide to FhaC<sup>C4+C391</sup> increased CCS values at both low and high CE, suggesting that it induces enlargement of the  $\beta$  barrel, even with H1 inside.

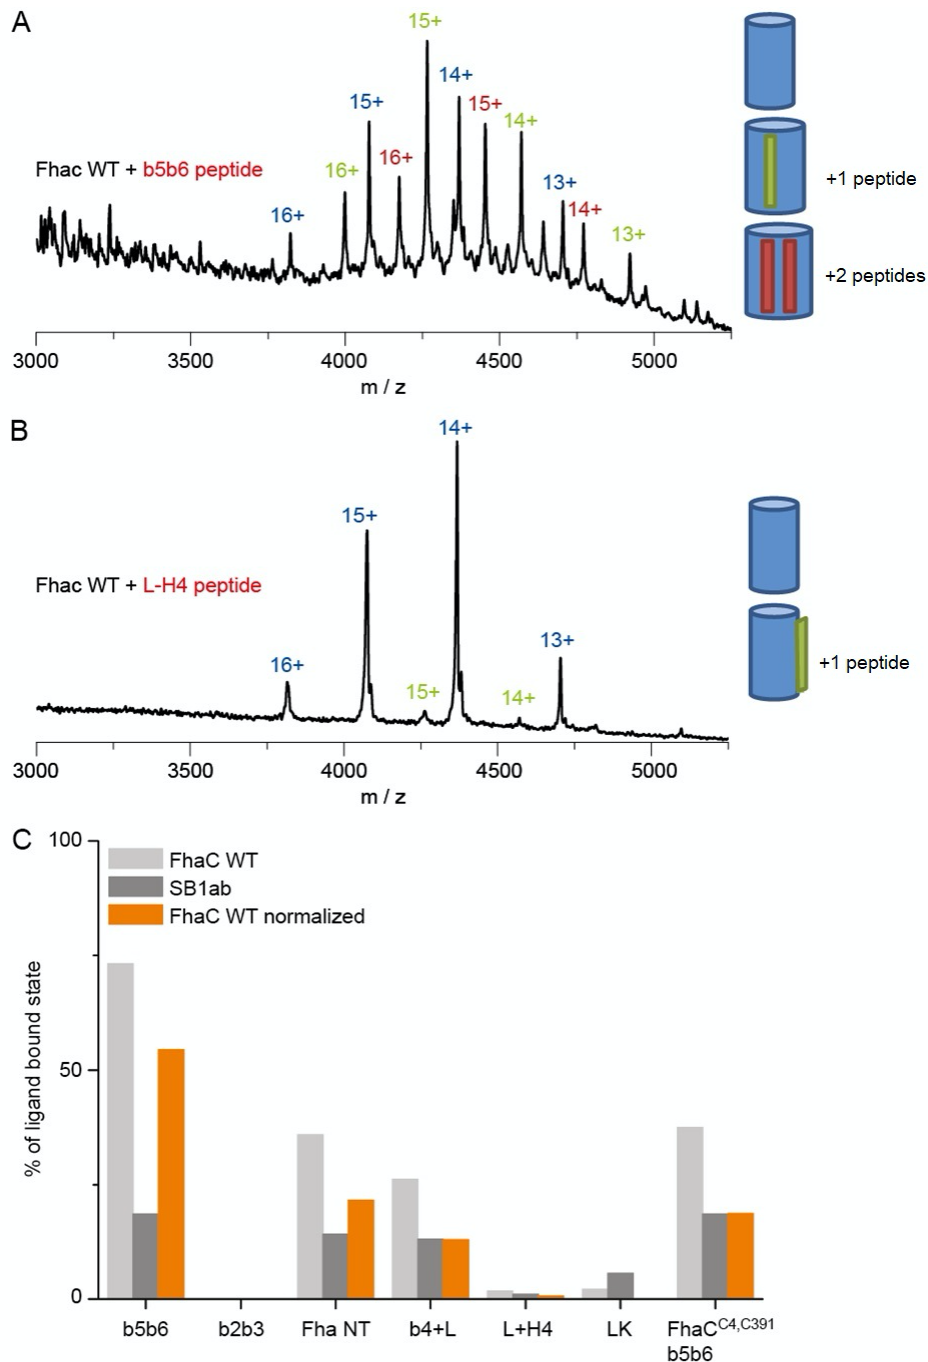

**Figure 8. Binding of synthetic peptides to FhaC.** (A) Mass spectrum of FhaC incubated with the b5-b6 peptide at a collisional energy of 150 V shows binding of the peptide to the protein under high-energy conditions. Schematic representations of the barrel with bound peptides are shown at the right. (B) Under similar conditions, little binding was detected for the L-H4 peptide. (C) Quantification of the binding of synthetic peptides to FhaC (light grey) and to the control  $\beta$ -barrel protein SphB1- $\alpha\beta$  (SB1ab, dark grey; used to correct for non-specific binding). Orange bars show normalized values. The peptides used in this study are shown in Supplement 1.

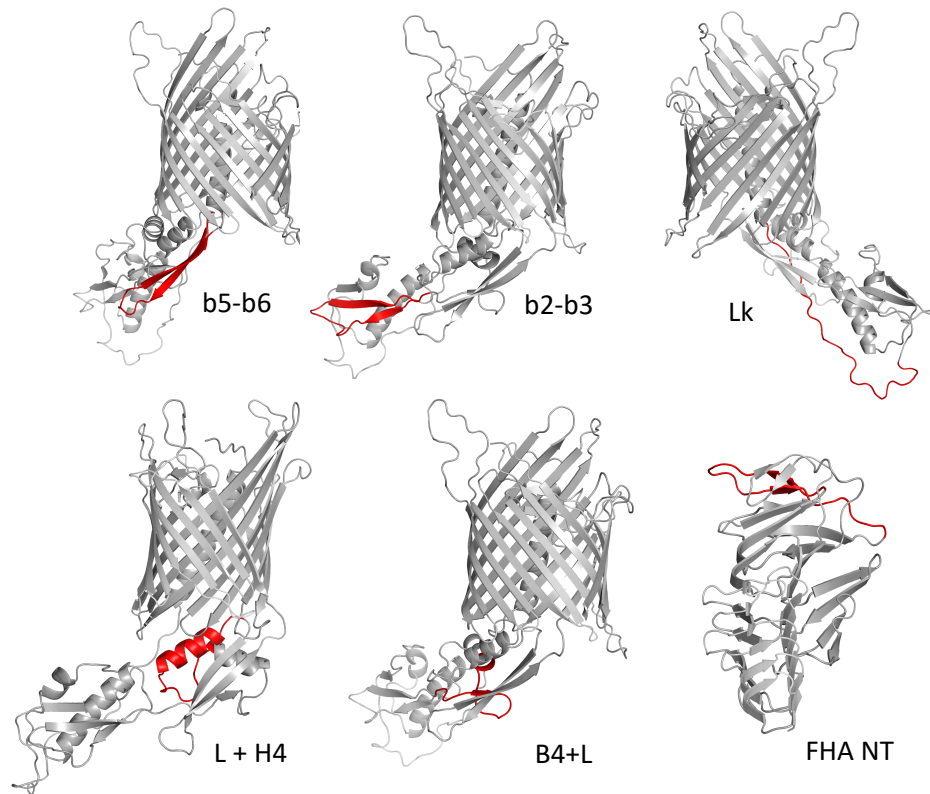

**Figure 8 Supplement 1. Synthetic peptides used in this study.** The first 5 peptides are shown in red on the structural model of FhaC, and the last one on the structural model of the N-terminal portion of FhaB (PDB 1RWR). The b5-b6 peptide (GKTGNITIVPADEYGYSYLDLQLQR) corresponds to the last two  $\beta$  strands of the POTRA2 domain that form an amphipathic  $\beta$  hairpin immediately preceding B1, the first strand of the  $\beta$  barrel. The b2-b3 peptide (SIVTFVPPGVVDGVLKLVKVEWGR) encompasses the last two  $\beta$  strands of the POTRA1 domain. The Lk peptide (RPPVELNPQSEAAAPARKPDATSGH) corresponds to the linker between the H1 helix and the POTRA1 domain. The L+H4 peptide (AMPGWQDKVLNVFDIDQAIYNINNG) encompasses the loop (extended) region that precedes the H4  $\alpha$  helix and the H4 helix of the POTRA2 domain. The B4+L peptide (RIKGWLIDGKPLEGTRDR) corresponds to the  $\beta$  strand b4 of the POTRA2 domain followed by a loop region. Finally, the FHA-NT peptide (QTQVLQGGNKVPVVNIADPNS) corresponds to the N-terminal  $\beta$  strands b2 and b3 of FhaB forming a short hairpin, preceded and followed by loop regions.

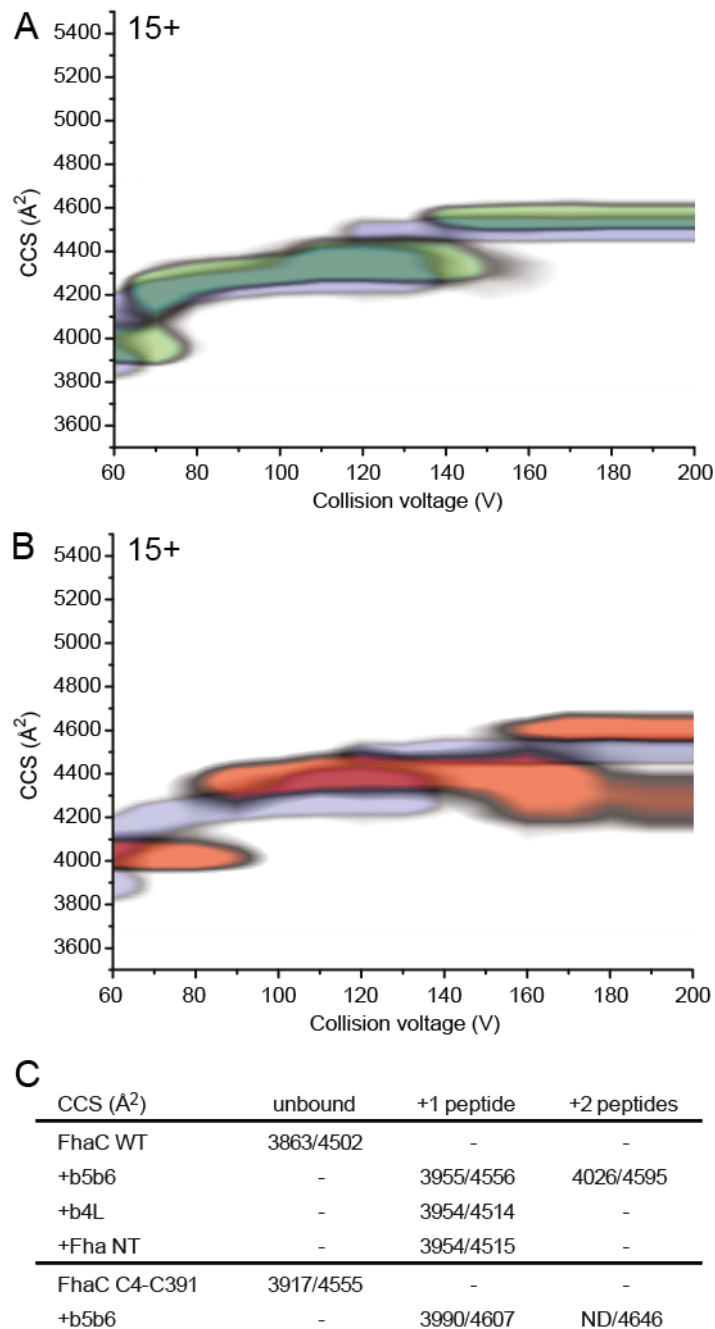

**Figure 9. Collision-induced unfolding of FhaC with bound b5-b6 peptide.** (A) Overlay of the CIU plots of FhaC with (green) and without (blue) one b5-b6 peptide bound. Increased CCS values are observed both under native conditions (low CE) and conditions in which the POTRA domains are most likely unfolded (high CE). (B) Comparison of the CIU plots of unbound FhaC (blue) and FhaC with two b5-b6 peptides bound (orange), which shows an additional CCS increase compared to FhaC with a single peptide bound. (C) CCS of FhaC with various peptides determined at low and high CE (listed before and after the slash). The measured values indicate that only b5-b6 enlarges FhaC in both conditions. The CIU plots of wt FhaC with the b4L and FhaNT peptides are shown in Supplement 1. The CIU plot of FhaC<sup>C4+C391</sup> with the b5-b6 peptide are shown in Figure 7 Supplement 3.

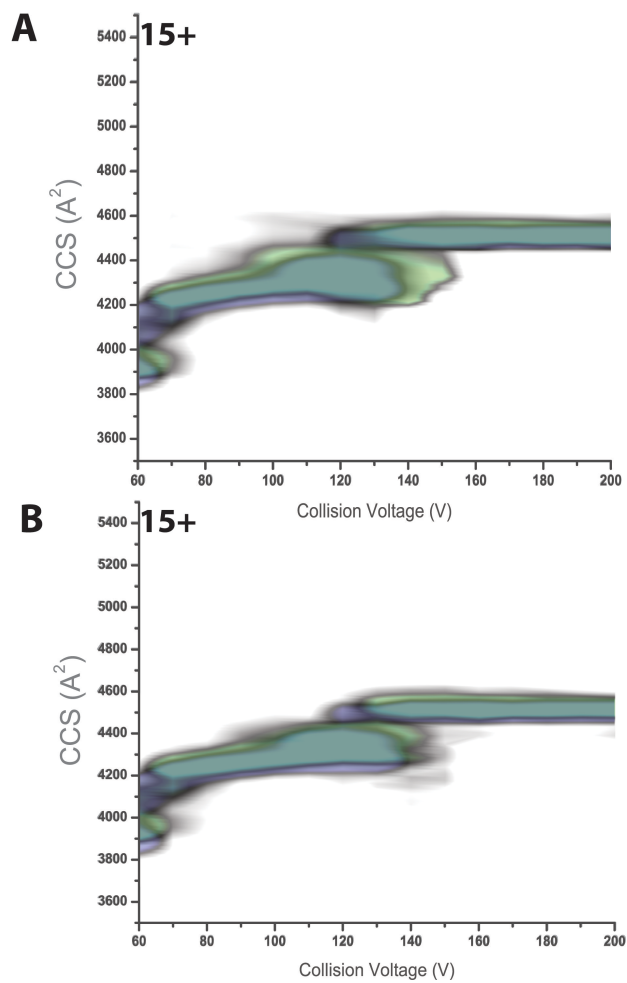

**Figure 9 Supplement 1. CIU plots of FhaC incubated with synthetic peptides.** (A) FhaC without (blue) or with (green) the FHA-NT peptide. (B) FhaC without (blue) or with (green) the B4+L peptide. In both cases the presence of the peptide causes an increased CCS at low collision voltage, but not at elevated collisional activation.
